# Supplementary material for: Natural Carbonation of Alkaline Industrial Wastes: A Large-Scale, Unaccounted Sink for CO2
Source: Research Square preprint supplement (doi:10.21203/rs.3.rs-5763182/v1), 2025-01-22
Supplement: Supplementary file 1 [file 887ff2f9262cb319f126ccae.xlsx]

## Sheet: Index
Supplementary Data (41 tables in total)
Data S1: Estimates of Blast furnace slag (BFS) production by region
Data S2: Estimates of Steel slag (SS) production by region
Data S3: Estimates of Magnesium slag (MgS) production by region
Data S4: Estimates of Red mud (RM) production by region
Data S5: Estimates of Cement waste (CW) production by region
Data S6: Estimates of Lime kiln dust (LKD) production by region
Data S7: Estimates of Calcium carbide slag (CCS) production by region
Data S8: Estimates of Lime mud (LM) production by region
Data S9: Estimates of Yellow Phosphorus slag (YPS) production by region
Data S10: Estimates of Coal combustion products (CCP) production by region
Data S11: Estimates of Oil shale ash (OSA) production by region
Data S12:Municipal solid waste incineration ash (MSWI-A) production by region
Data S13:Biomass ash (BA) production by region
Data S14:Summary of estimated global production of alkaline solid wastes
Data S15: Estimates of Utilization of Blast furnace slag by region, 1930-2020
Data S16: Estimates of Utilization of Steel slag by region, 1930-2020
Data S17: Estimates of Utilization of Coal combustion ash by region, 1930-2020
Data S18: Estimates of Utilization of other alkaline solid wastes, by region
Data S19: Particle size distribution of Alkaline solid wastes
Data S20: Estimates of cement used for concrete and mortar by region
Data S21: Distribution of concrete by strength class and region
Data S22: Exposure times of cement materials in service life by region
Data S23: Exposure times of cement materials in demolition stage by region (td)
Data S24: Waste concrete particle size distribution sruvey in China
Data S25: Categories of mortar use and their proportions as surveyed in China
Data S26: Distribution of mortar uses and related parameters
Data S27: Content of CaO and MgO of Alkaline solid wastes by region
Data S28: Carbonation rate coefficients of Alkaline solid wastes
Data S29: CaO converted to CaCO3 of Alkaline solid wastes
Data S30: Concrete carbonation rate coefficients by region
Data S31: Mortar carbonation rate coefficients measured in China
Data S32: Measurements of CaO converted to CaCO3 in Chinese mortars
Data S33: U.S. survey results of proportion of cement kiln dust (CKD) diverted to landfill
Data S34: Variables considered in the CO2 uptake uncertainty analysis of Alkaline solid wastes
Data S35: Variables considered in the CO2 uptake uncertainty analysis of cement and concrete waste
Data S36: Estimation of the carbon sink potential of alkaline solid wastes
Data S37: Global CO2 uptake by Alkaline solid wastes, 1930-2020
Data S38: CO2 uptake by Alkaline solid wastes in China, 1930-2020
Data S39: CO2 uptake by Alkaline solid wastes in U.S., 1930-2020
Data S40: CO2 uptake by Alkaline solid wastes in EU27&UK, 1930-2020
Data S41: CO2 uptake by Alkaline solid wastes in ROW, 1930-2020

## Sheet: Data S1
Supplementary Data 1: Estimates of Blast furnace slag (BFS) production by region
Blast furnace slag (BFS) production*
Year	1930	1931	1932	1933	1934	1935	1936	1937	1938	1939	1940	1941	1942	1943	1944	1945	1946	1947	1948	1949	1950	1951	1952	1953	1954	1955	1956	1957	1958	1959	1960	1961	1962	1963	1964	1965	1966	1967	1968	1969	1970	1971	1972	1973	1974	1975	1976	1977	1978
China (million ton)	0.3	0.296102	0.292255	0.288457	0.284709	0.569466	0.598542	0.593135	0.630462	0.62227	1.45726	1.69764	4.05431	1.57552	1.7666	0.405653	0.00111619	0.108888	0.116166	0.247252	0.786778	0.98779	1.49679	2.21601	2.21373	2.65401	3.62614	3.86198	6.58574	14.0309	18.5669	14.6968	9.84967	11.0179	11.5145	11.9962	12.4635	8.61111	11.5347	11.984	13.0649	15.9199	16.2368	16.0258	16.8381	17.6265	12.054	13.5473	18.57
The United States (million ton)	10.0066	5.80172	2.76547	4.21319	5.0834	6.73182	9.78708	11.7024	6.03715	10.0197	13.3381	15.9516	17.148	17.6605	17.6884	15.4552	13.0272	16.9133	17.4263	15.4302	18.6651	20.3996	17.8273	21.711	16.8039	22.2909	21.8421	22.7569	16.555	17.4741	19.2978	18.7626	19.0211	20.7695	24.7261	25.5962	26.4354	25.1949	25.7008	27.4458	25.6741	22.8868	24.991	28.4931	26.8507	22.4197	24.424	22.9183	24.6608
EU27&UK (million ton)	11.4393	8.40902	6.46816	7.43924	9.07987	10.1833	11.6917	13.153	12.3225	14.2613	10.3916	9.89523	9.99755	10.5331	8.44742	6.03705	6.20329	7.52835	10.3642	12.1188	12.7608	14.5283	15.5178	15.0805	15.9883	18.9505	20.1803	22.1939	21.481	22.7718	26.5549	26.7076	26.4205	26.6075	30.2508	31.5649	30.6563	33.2338	36.0154	38.655	38.7464	36.9485	39.3907	44.5152	46.4391	39.5091	40.3817	38.7616	39.7087
ROW (million ton)	3.31631	2.97535	2.95805	3.50379	4.66892	5.87516	6.72273	7.2451	7.12082	7.12197	9.70048	7.73852	5.94906	5.63749	5.13646	3.46472	5.56906	6.5162	7.19386	8.31265	9.79724	11.1691	13.3667	14.673	15.4832	17.2941	18.9151	18.9553	19.9756	22.8896	25.7759	29.0691	32.3178	34.8258	37.8844	41.0153	44.4314	47.6554	52.047	56.9915	62.2632	65.0054	67.2608	73.6245	76.1828	76.8001	83.3864	83.1755	81.8695
World (million ton)	25.0622	17.4822	12.4839	15.4447	19.1169	23.3598	28.8	32.6936	26.1109	32.0253	34.8874	35.2829	37.1489	35.4066	33.0389	25.3626	24.8007	31.0667	35.1006	36.109	42.01	47.0848	48.2086	53.6806	50.4892	61.1895	64.5636	67.7681	64.5973	77.1664	90.1955	89.2361	87.609	93.2206	104.376	110.173	113.987	114.695	125.298	135.076	139.748	140.761	147.879	162.659	166.311	156.355	160.246	158.403	164.809
* Estimated blast furnace slag production from 1930 to 2020, based on pig iron production and blast furnace slag output.
Pig iron production*
Year	1930	1931	1932	1933	1934	1935	1936	1937	1938	1939	1940	1941	1942	1943	1944	1945	1946	1947	1948	1949	1950	1951	1952	1953	1954	1955	1956	1957	1958	1959	1960	1961	1962	1963	1964	1965	1966	1967	1968	1969	1970	1971	1972	1973	1974	1975	1976	1977	1978
China (million ton)	0.3	0.3	0.3	0.3	0.3	0.607949	0.647402	0.65	0.7	0.7	1.66087	1.96031	4.74325	1.86751	2.12157	0.493575	0.001376	0.136	0.147	0.317	1.022	1.3	1.99581	2.99371	3.03	3.68045	5.09475	5.49754	9.49822	20.5024	27.4877	22.0446	14.9685	16.9644	17.9623	18.9602	19.9581	13.9706	18.9602	19.9581	22.0446	27.2155	28.1227	28.1227	29.9371	31.7515	21.9992	25.0501	34.7896
The United States (million ton)	32.2793	18.7152	8.92088	13.5909	16.3981	21.7155	31.5712	37.7496	19.4747	32.3217	43.026	51.4566	55.3161	56.9692	57.0595	49.8556	42.0233	54.559	56.214	49.775	60.21	65.805	57.5073	70.0356	54.2061	71.9062	70.4583	73.4094	53.4032	56.3679	62.251	60.5246	61.3583	66.9983	79.7615	82.5683	85.2754	81.2738	82.9058	88.5349	82.8196	73.8285	80.6161	91.9132	86.6153	72.3217	78.7872	73.9301	79.551
EU27&UK (million ton)	36.901	27.1259	20.865	23.9975	29.2899	32.8494	37.7152	42.4291	39.7499	46.0042	33.5212	31.9201	32.2502	33.9778	27.2497	19.4744	20.0106	24.285	33.433	39.093	41.164	46.8655	50.0575	48.6469	51.5753	61.1306	65.0978	71.5932	69.2935	73.4575	85.6609	86.1535	85.2273	85.8306	97.5831	101.822	98.8913	107.206	116.179	124.693	124.988	119.189	127.067	143.597	149.803	127.449	130.264	125.037	128.093
ROW (million ton)	10.6978	9.59792	9.54208	11.3025	15.061	18.9521	21.6862	23.3713	22.9704	22.9741	31.2919	24.963	19.1905	18.1855	16.5692	11.1765	17.9647	21.02	23.206	26.815	31.604	36.0295	43.1185	47.3324	49.946	55.7873	61.0163	61.1461	64.4373	73.8376	83.148	93.7712	104.251	112.341	122.208	132.307	143.327	153.727	167.894	183.844	200.849	209.695	216.97	237.498	245.751	247.742	268.988	268.308	264.095
World (million ton)	80.178	55.739	39.628	49.191	61.049	74.125	91.62	104.2	82.895	102	109.5	110.3	111.5	111	103	81	80	100	113	116	134	150	152.679	169.009	158.757	192.505	201.667	211.646	196.632	224.165	258.548	262.494	265.805	282.134	317.515	335.658	347.452	356.177	385.938	417.03	430.701	429.928	452.776	501.132	512.107	479.264	500.038	492.326	506.528
* The pig iron production data is sourced from the US Geological Survey (USGS) & the British Geological Survey (BGS).
Average BFS/Pig iron
Year	1930	1931	1932	1933	1934	1935	1936	1937	1938	1939	1940	1941	1942	1943	1944	1945	1946	1947	1948	1949	1950	1951	1952	1953	1954	1955	1956	1957	1958	1959	1960	1961	1962	1963	1964	1965	1966	1967	1968	1969	1970	1971	1972	1973	1974	1975	1976	1977	1978
China1,2	1	0.987007	0.974182	0.961524	0.949031	0.9367	0.924529	0.912516	0.900659	0.888957	0.877406	0.866006	0.854753	0.843647	0.832685	0.821866	0.811187	0.800647	0.790244	0.779976	0.769842	0.759839	0.749966	0.740221	0.730603	0.72111	0.711741	0.702493	0.693365	0.684356	0.675464	0.666687	0.658025	0.649475	0.641036	0.632707	0.624486	0.616371	0.608363	0.600458	0.592656	0.584955	0.577355	0.569853	0.562449	0.555141	0.547927	0.540808	0.533781
The United States3	0.31	0.31	0.31	0.31	0.31	0.31	0.31	0.31	0.31	0.31	0.31	0.31	0.31	0.31	0.31	0.31	0.31	0.31	0.31	0.31	0.31	0.31	0.31	0.31	0.31	0.31	0.31	0.31	0.31	0.31	0.31	0.31	0.31	0.31	0.31	0.31	0.31	0.31	0.31	0.31	0.31	0.31	0.31	0.31	0.31	0.31	0.31	0.31	0.31
EU27&UK4	0.31	0.31	0.31	0.31	0.31	0.31	0.31	0.31	0.31	0.31	0.31	0.31	0.31	0.31	0.31	0.31	0.31	0.31	0.31	0.31	0.31	0.31	0.31	0.31	0.31	0.31	0.31	0.31	0.31	0.31	0.31	0.31	0.31	0.31	0.31	0.31	0.31	0.31	0.31	0.31	0.31	0.31	0.31	0.31	0.31	0.31	0.31	0.31	0.31
ROW5	1	0.987007	0.974182	0.961524	0.949031	0.9367	0.924529	0.912516	0.900659	0.888957	0.877406	0.866006	0.854753	0.843647	0.832685	0.821866	0.811187	0.800647	0.790244	0.779976	0.769842	0.759839	0.749966	0.740221	0.730603	0.72111	0.711741	0.702493	0.693365	0.684356	0.675464	0.666687	0.658025	0.649475	0.641036	0.632707	0.624486	0.616371	0.608363	0.600458	0.592656	0.584955	0.577355	0.569853	0.562449	0.555141	0.547927	0.540808	0.533781
Note
1.The USGS states that the blast furnace slag yield ranges from 0.25 to 0.3. For some lower-grade iron ores, the yield is approximately from 1 to 1.2. Considering the early technology level and iron ore grade in China, the initial slag yield is set at 1 (according to Xi).
2.China's blast furnace slag yield ranges from 0.296 to 1 (data sourced from Wang, L. et al. Indirect mineral carbonation of titanium-bearing blast furnace slag coupled with recovery of TiO2 and Al2O3. Chin J Chem Eng 26, (2018) & Technical guidelines of accounting method for pollution source intensity-Iron and steel industry). For the year 1930, the slag yield is set at 1 (as determined by Profe…
3.Early data on U.S. blast furnace slag yield is not available. According to USGS, the blast furnace slag yield in 1995 was between 0.25 and 0.3. Considering early technology levels, the average yield for 1930-1995 is set at 0.31 by Professor Xi, with a maximum and minimum range of 0.22 to 0.37. From 1996 onwards, the slag yield is based on USGS data, where the yield ranges from 0.22 to 0.37 betw…
4.Early European data is not available. Data before 2001 references the U.S., and data after 2002 references the literature: "0.15 and 0.346, data sourced from Gast, L., Cabrera Serrenho, A. & Allwood, J. M. What Contribution Could Industrial Symbiosis Make to Mitigating Industrial Greenhouse Gas (GHG) Emissions in Bulk Material Production? Environ Sci Technol 56, (2022)."
5.Data from other countries references China.
[truncated: 42 more columns]

## Sheet: Data S2
Supplementary Data 2: Estimates of Steel slag (SS) production by region
Steel slag (SS) production*
	1930	1931	1932	1933	1934	1935	1936	1937	1938	1939	1940	1941	1942	1943	1944	1945	1946	1947	1948	1949	1950	1951	1952	1953	1954	1955	1956	1957	1958	1959	1960	1961	1962	1963	1964	1965	1966	1967	1968	1969	1970	1971	1972	1973	1974	1975	1976	1977	1978
China (million ton)	0.0165	0.0163777	0.0216751	0.0322718	0.0533877	0.272379	0.435523	0.580571	0.906897	0.53702	0.545294	0.583823	0.769644	0.921722	0.486687	0.255806	0.0156253	0.0610685	0.042335	0.150895	0.57825	0.846834	1.26084	1.64085	2.05197	2.60304	4.05252	4.81503	7.86708	12.3561	16.85	7.61237	5.65627	6.26416	7.68415	9.45526	11.4911	7.42497	6.38859	9.14894	11.863	13.8189	14.7368	15.4667	12.6089	13.8985	11.5911	13.1241	17.1483
The United States (million ton)	37.4399	23.8671	12.5855	20.9847	23.9694	33.3133	46.1163	48.8501	26.6191	46.684	59.7322	74.5727	78.2526	81.2928	83.4879	75.2433	57.902	75.054	79.8761	71.8351	100.923	108.741	95.5877	113.734	89.4372	117.858	115.425	112.381	84.6286	92.3814	98.1638	87.7879	80.9452	75.0904	80.3609	76.8869	73.1355	64.261	62.3697	63.4438	56.3852	45.5448	44.481	46.5481	36.0817	24.9544	27.3058	23.5023	25.6713
EU27&UK (million ton)	39.6888	31.1873	25.7102	29.8501	36.4453	40.8052	35.379	39.7661	36.7494	50.8914	42.688	42.7726	43.2266	45.163	38.7107	17.8039	28.7084	33.6052	43.8132	52.3223	59.7735	66.2809	72.2473	72.9001	77.6798	89.6484	95.6851	100.782	97.6118	105.206	125.222	114.2	105.561	99.7562	103.72	99.8248	86.7188	89.8837	92.0622	93.5471	93.2295	79.0019	75.351	74.8137	62.7334	47.2068	49.6839	42.3372	44.9773
ROW (million ton)	10.5171	9.01406	8.74856	12.3089	15.9407	18.0523	34.0757	35.6885	37.9306	24.3243	23.6373	25.9951	20.5683	34.7926	32.0793	25.2992	20.1401	23.752	30.2881	34.9324	50.9058	58.5985	64.222	69.1392	73.2041	81.0059	88.3503	92.569	94.6827	109.143	123.358	133.49	138.254	122.182	130.672	133.957	144.779	151.372	159.932	167.423	173.678	169.566	176.265	193.541	194.255	182.354	185.052	182.378	184.523
World (million ton)	87.6622	64.0848	47.066	63.176	76.4087	92.4432	116.006	124.885	102.206	122.437	126.603	143.924	142.817	162.17	154.765	118.602	106.766	132.472	154.02	159.241	212.18	234.467	233.318	257.414	242.373	291.116	303.513	310.547	284.79	319.087	363.594	343.091	330.416	303.293	322.437	320.124	316.125	312.942	320.753	333.563	335.156	307.932	310.834	330.37	305.679	268.413	273.632	261.342	272.32
* Estimated steel slag production from 1930 to 2020, based on crude steel prodcution and steel slag output.
Crude steel production*
Year	1930	1931	1932	1933	1934	1935	1936	1937	1938	1939	1940	1941	1942	1943	1944	1945	1946	1947	1948	1949	1950	1951	1952	1953	1954	1955	1956	1957	1958	1959	1960	1961	1962	1963	1964	1965	1966	1967	1968	1969	1970	1971	1972	1973	1974	1975	1976	1977	1978
China (million ton)1	0.015	0.015	0.02	0.03	0.05	0.257	0.414	0.556	0.875	0.522	0.534	0.576	0.765	0.923	0.491	0.26	0.016	0.063	0.044	0.158	0.61	0.9	1.35	1.77	2.23	2.85	4.47	5.35	8.8	13.87	18.66	8.7	6.67	7.62	9.64	12.23	15.32	10.2	9.04	13.33	17.79	21.32	23.38	25.22	21.12	23.9	20.45	23.74	31.78
The United States (million ton)2	40.6972	25.9436	13.6805	22.8105	26.0548	36.2116	50.6507	54.2004	29.8263	52.7987	66.9827	82.8393	86.0319	88.3695	89.6416	79.7016	60.42	77.014	80.413	70.74	96.836	105.2	93.168	111.61	88.312	117.036	115.216	112.715	85.255	93.446	99.282	98.014	98.328	99.1	115	119	122	115	119	128	119	109	121	137	132	106	116	114	124
EU27&UK (million ton)2	43.1418	33.9007	27.947	32.4472	39.6161	44.3553	38.8576	44.1215	41.1772	57.5573	47.8696	47.514	47.5239	49.0946	41.5639	18.8588	29.9569	34.4828	44.1077	51.5247	57.3531	64.1225	70.4184	71.5388	76.7025	89.0229	95.512	101.081	98.3343	106.418	126.648	127.503	128.23	131.652	148.428	154.502	144.659	160.854	175.653	188.734	196.759	189.071	204.975	220.191	229.502	200.522	211.066	205.36	217.253
ROW (million ton)	9.56099	8.25578	8.07244	11.4424	14.9291	17.0331	32.3917	34.1781	36.5965	23.644	23.1477	25.6467	20.4442	34.8409	32.3636	25.7139	20.6231	24.5032	31.4793	36.5773	53.7009	62.2775	68.7636	74.5812	79.5555	88.6911	97.452	102.854	105.911	122.516	136.61	152.563	163.032	148.628	163.932	173.268	193.021	207.946	226.307	243.936	260.451	261.609	279.645	315.589	325.378	313.578	326.484	329.9	341.967
World (million ton)2	93.415	68.115	49.72	66.73	80.65	97.857	122.314	133.056	108.475	134.522	138.534	156.576	154.765	173.228	164.06	124.534	111.016	136.063	156.044	159	208.5	232.5	233.7	259.5	246.8	297.6	312.65	322	298.3	336.25	381.2	386.78	396.26	387	437	459	475	494	530	574	594	581	629	698	708	644	674	673	715
1.Data on China's crude steel production from 1930 to 1948 is sourced from 'World History Statistics,' while data from 1949 to 2020 is sourced from the 'China Steel Yearbook' (paper edition).
2.Crude steel production data for the United States, EU27 & UK, and the total global production are obtained from the US Geological Survey (USGS) (Iron and Steel Statistics and Information).
Average SS/Crude steel
Year	1930	1931	1932	1933	1934	1935	1936	1937	1938	1939	1940	1941	1942	1943	1944	1945	1946	1947	1948	1949	1950	1951	1952	1953	1954	1955	1956	1957	1958	1959	1960	1961	1962	1963	1964	1965	1966	1967	1968	1969	1970	1971	1972	1973	1974	1975	1976	1977	1978
China1-4	1.1	1.09185	1.08376	1.07573	1.06775	1.05984	1.05199	1.04419	1.03645	1.02877	1.02115	1.01358	1.00607	0.998616	0.991215	0.98387	0.976579	0.969342	0.962159	0.955029	0.947951	0.940926	0.933954	0.927033	0.920164	0.913349	0.906603	0.900006	0.893986	0.890852	0.903	0.874985	0.848017	0.822068	0.797111	0.77312	0.75007	0.727939	0.706703	0.686342	0.666836	0.648167	0.630317	0.61327	0.597011	0.581526	0.566802	0.552828	0.539593
The United States1-3,5	0.919961	0.919961	0.919961	0.919961	0.919961	0.919961	0.910478	0.901287	0.89247	0.884187	0.891755	0.90021	0.909577	0.919919	0.931352	0.944061	0.958325	0.97455	0.993324	1.01548	1.0422	1.03366	1.02597	1.01903	1.01274	1.00703	1.00181	0.997039	0.992653	0.988608	0.988737	0.895667	0.823216	0.757724	0.69879	0.646108	0.599472	0.558791	0.524115	0.495655	0.473825	0.417843	0.367611	0.339767	0.273346	0.235419	0.235395	0.206161	0.207027
EU27&UK6	0.919961	0.919961	0.919961	0.919961	0.919961	0.919961	0.910478	0.901287	0.89247	0.884187	0.891755	0.90021	0.909577	0.919919	0.931352	0.944061	0.958325	0.97455	0.993324	1.01548	1.0422	1.03366	1.02597	1.01903	1.01274	1.00703	1.00181	0.997039	0.992653	0.988608	0.988737	0.895667	0.823216	0.757724	0.69879	0.646108	0.599472	0.558791	0.524115	0.495655	0.473825	0.417843	0.367611	0.339767	0.273346	0.235419	0.235395	0.206161	0.207027
ROW7	1.1	1.09185	1.08376	1.07573	1.06775	1.05984	1.05199	1.04419	1.03645	1.02877	1.02115	1.01358	1.00607	0.998616	0.991215	0.98387	0.976579	0.969342	0.962159	0.955029	0.947951	0.940926	0.933954	0.927033	0.920164	0.913349	0.906603	0.900006	0.893986	0.890852	0.903	0.874985	0.848017	0.822068	0.797111	0.77312	0.75007	0.727939	0.706703	0.686342	0.666836	0.648167	0.630317	0.61327	0.597011	0.581526	0.566802	0.552828	0.539593
Note
1.After the advent of the basic open hearth furnace steelmaking method in 1888, it was widely adopted by various countries, becoming the world's primary steelmaking method. Until the invention and rapid promotion of the oxygen top-blown converter in 1952, the open hearth furnace gradually lost its dominant position and had almost disappeared by the 1990s. Source: https://www.sohu.com/a/358246953_…
2.The differences in steelmaking processes over different periods are significant, and the slag yield varies greatly with each process. The yields are as follows: Open hearth furnace: 1.1; Converter: 0.115; Electric furnace: 0.175; Other types of furnaces: 1.1 (Data from the Academy of Engineering consultation report "Research on the Current Status and Strategies for Resource Utilization of Major…
3.Over the past 30 years, electric arc furnace steelmaking has held an important position in the European and American steel industry. Although it is not yet mainstream in China, with the advancement of the national "carbon peaking and carbon neutrality goals", the rapid increase in scrap steel resources, and the reduction in scrap steel prices, electric arc furnace steelmaking will also become a…
4.China primarily used open hearth furnaces in the early period and only began to adopt converters in the early 1950s. The average slag yield was estimated based on the proportion of different types of furnaces. For 1930, the yield data from open hearth furnaces (1.1) was used. Data from 1931 to 1984 was fitted using the power function to estimate the missing data. The yield data from 1985 to 201…
5.U.S. data is mainly sourced from the USGS, with the slag yield for different years determined by the proportion of different types of furnaces.
6.European data references the U.S.
7.Data from other countries references China.
[truncated: 42 more columns]

## Sheet: Data S3
Supplementary Data 3: Estimates of Magnesium slag (MgS) production by region
Magnesium slag (MgS) production*
Year	1930	1931	1932	1933	1934	1935	1936	1937	1938	1939	1940	1941	1942	1943	1944	1945	1946	1947	1948	1949	1950	1951	1952	1953	1954	1955	1956	1957	1958	1959	1960	1961	1962	1963	1964	1965	1966	1967	1968	1969	1970	1971	1972	1973	1974	1975	1976	1977	1978
China (million ton)												0	0	0	0	0	0	0	0	0	0	0	0	0	0	0	0	0	0	0	0	0	0	0	0	0	0	0	0	0	0	0	0	0	0	0	0	0	0
The United States (million ton)												0	0	0	0	0	0	0	0	0	0	0	0	0	0	0	0	0	0	0	0	0	0	0	0	0	0	0	0	0	0	0	0	0	0	0	0.187138	0.1965	0.233168
EU27&UK (million ton)												0.0640287	0.083752	0.0960414	0.0866828	0.0187514	0.00586348	0.00557796	0.00509636	0.00531824	0.00613696	0.0112694	0.00350229	0.00419807	0.00508261	0.0077612	0.00977677	0.00975493	0.0111761	0.0116192	0.0135614	0.0141761	0.0143992	0.0134522	0.0129249	0.0166004	0.0174288	0.0183664	0.0190496	0.0191121	0.0209654	0.0256627	0.0273459	0.0302039	0.024009	0.0238624	0.0243319	0.0300042	0.0312601
ROW (million ton)												0.017061	0.0255442	0.0342122	0.038247	0.0188034	0.0342034	0.0386298	0.0417164	0.0470514	0.0509652	0.0821964	0.113606	0.144136	0.125736	0.153426	0.16639	0.0821786	0.0800954	0.0856406	0.105231	0.131633	0.135917	0.148721	0.153855	0.17024	0.175452	0.189344	0.200775	0.216521	0.230882	0.222922	0.235611	0.24653	0.250248	0.239924	0.26704	0.265115	0.282656
World (million ton)												0.0810897	0.109296	0.130254	0.12493	0.0375548	0.0400669	0.0442078	0.0468128	0.0523696	0.0571022	0.0934658	0.117108	0.148334	0.130819	0.161188	0.176167	0.0919335	0.0912715	0.0972598	0.118793	0.145809	0.150316	0.162173	0.16678	0.18684	0.19288	0.20771	0.219825	0.235633	0.251847	0.248585	0.262957	0.276734	0.274257	0.263787	0.47851	0.491619	0.547085
* Estimated magnesium slag production from 1930 to 2020, based on primary magnesium production, proportion of magnesium produced by 'Pidgeonprocess' and magnesium slag output.
Primary magnesium production*
Year	1930	1931	1932	1933	1934	1935	1936	1937	1938	1939	1940	1941	1942	1943	1944	1945	1946	1947	1948	1949	1950	1951	1952	1953	1954	1955	1956	1957	1958	1959	1960	1961	1962	1963	1964	1965	1966	1967	1968	1969	1970	1971	1972	1973	1974	1975	1976	1977	1978
China (million ton)										0	5e-06	6.2e-05	0.000316	0.000617	0.000834	0.000221	0.000221	0	0	0	0	0	0	0	0	0	0	0	0.0009977	0.0009977	0.000907	0.000907	0.000907	0.000907	0.000907	0.000907	0.000907	0.000907	0.0009977	0.0009977	0.0009977	0.0009977	0.0009977	0.0009977	0.0009977	0.0009977	0.0049885	0.0049885	0.0059862
The United States (million ton)*										0.003039	0.00568	0.014782	0.044418	0.166544	0.142518	0.029743	0.004823	0.011198	0.009075	0.010521	0.014266	0.037086	0.0959796	0.084419	0.0632442	0.0554494	0.0619898	0.0737055	0.0272971	0.0281469	0.0363435	0.0369557	0.0625422	0.0687914	0.0720956	0.0737944	0.0723732	0.0883472	0.0892261	0.0905975	0.10159	0.114722	0.109586	0.111045	0.111045	0.111045	0.108801	0.114244	0.135563
EU27&UK (million ton)*										0.023054	0.02692	0.037226	0.048693	0.055838	0.050397	0.010902	0.003409	0.003243	0.002963	0.003092	0.003568	0.006552	0.00203622	0.00244074	0.00295501	0.00451233	0.00568417	0.00567147	0.00649775	0.00675534	0.00788455	0.00824191	0.00837161	0.00782106	0.0075145	0.00965139	0.010133	0.0106781	0.0110754	0.0111117	0.0121892	0.0149202	0.0158988	0.0175604	0.0139587	0.0138735	0.0141465	0.0174443	0.0181745
ROW (million ton)*										0.003324	0.00518	0.007755	0.011611	0.015551	0.017385	0.008547	0.015547	0.017559	0.018962	0.021387	0.023166	0.037362	0.0516391	0.0655162	0.0571528	0.0697392	0.075632	0.0373539	0.036407	0.0389275	0.0478325	0.059833	0.0617803	0.0676005	0.0699342	0.0773816	0.0797507	0.0860652	0.0912614	0.0984186	0.104946	0.101328	0.107096	0.112059	0.113749	0.109056	0.121382	0.120507	0.12848
World (million ton)										0.029417	0.037785	0.059825	0.105038	0.23855	0.211134	0.049413	0.024	0.032	0.031	0.035	0.041	0.081	0.149655	0.152376	0.123352	0.129701	0.143306	0.116731	0.0711995	0.0748275	0.0929675	0.105938	0.133601	0.14512	0.150451	0.161734	0.163164	0.185998	0.192561	0.201125	0.219723	0.231968	0.233579	0.241662	0.23975	0.234973	0.249318	0.257183	0.288204
*Primary magnesium production data is obtained from the British Geological Survey (World Mineral Statistics, BGS website).
Proportion of magnesium produced by Pidgeonprocess*
Year	1930	1931	1932	1933	1934	1935	1936	1937	1938	1939	1940	1941	1942	1943	1944	1945	1946	1947	1948	1949	1950	1951	1952	1953	1954	1955	1956	1957	1958	1959	1960	1961	1962	1963	1964	1965	1966	1967	1968	1969	1970	1971	1972	1973	1974	1975	1976	1977	1978
China1,2
The United States1,3																																															0.215	0.215	0.215
EU27&UK1,4												0.215	0.215	0.215	0.215	0.215	0.215	0.215	0.215	0.215	0.215	0.215	0.215	0.215	0.215	0.215	0.215	0.215	0.215	0.215	0.215	0.215	0.215	0.215	0.215	0.215	0.215	0.215	0.215	0.215	0.215	0.215	0.215	0.215	0.215	0.215	0.215	0.215	0.215
ROW1,5												0.275	0.275	0.275	0.275	0.275	0.275	0.275	0.275	0.275	0.275	0.275	0.275	0.275	0.275	0.275	0.275	0.275	0.275	0.275	0.275	0.275	0.275	0.275	0.275	0.275	0.275	0.275	0.275	0.275	0.275	0.275	0.275	0.275	0.275	0.275	0.275	0.275	0.275
1.Most Western countries primarily use the electrolytic method for magnesium production. The Pidgeon process for magnesium production began in the 1940s, and China mainly uses the Pidgeon process for magnesium production. Data for the United States prior to 1976 is unavailable, and the Pidgeon process in Europe began in 1941
2.After 1987, China rapidly expanded its Pidgeon process operations and mainly produced magnesium using this method. Source: Wu L, Han F, Liu G. Comprehensive Utilization of Magnesium Slag by Pidgeon Process[M]. Springer Nature, 2021.
3.The ratio in the USA is approximately 0.2 to 0.23. Data sourced from: Zhang Yuanyuan. Research on the Dynamics and Parameters' Optimization of Smelting Magnesium by Silicon-thermo-reduction. Jilin University, 2013. & Wu L, Han F, Liu G. Comprehensive Utilization of Magnesium Slag by Pidgeon Process[M]. Springer Nature, 2021.
4.The distribution range of the proportion of the Pidgeon process in the EU27 & UK is referenced to that of the United States.
5.The distribution range of the proportion of the Pidgeon process in the ROW is referenced to the global standard. Data sourced from: Zhang Yuanyuan. Research on the Dynamics and Parameters' Optimization of Smelting Magnesium by Silicon-thermo-reduction. Jilin University, 2013. & Wu L, Han F, Liu G. Comprehensive Utilization of Magnesium Slag by Pidgeon Process[M]. Springer Nature, 2021.
Average MgS/Primary magnesium (Pidgeon process)*
Year	1930	1931	1932	1933	1934	1935	1936	1937	1938	1939	1940	1941	1942	1943	1944	1945	1946	1947	1948	1949	1950	1951	1952	1953	1954	1955	1956	1957	1958	1959	1960	1961	1962	1963	1964	1965	1966	1967	1968	1969	1970	1971	1972	1973	1974	1975	1976	1977	1978
Average MgS/primary magnesium												8	8	8	8	8	8	8	8	8	8	8	8	8	8	8	8	8	8	8	8	8	8	8	8	8	8	8	8	8	8	8	8	8	8	8	8	8	8
*The rate of MgS production to primary magnesium production is approximately 5.5 to 10 (with an average of 8). Source: Han, W., You, W. J., Ma, S. H., 2019. Experimental study on magnesium slag as admixture. Cement. DOI: 10.13739/j.cnki.cn11-1899/tq.2019.S1.009.
[truncated: 42 more columns]

## Sheet: Data S4
Supplementary Data 4: Estimates of Red mud (RM) production by region
Red mud (RM) production*
Year	1930	1931	1932	1933	1934	1935	1936	1937	1938	1939	1940	1941	1942	1943	1944	1945	1946	1947	1948	1949	1950	1951	1952	1953	1954	1955	1956	1957	1958	1959	1960	1961	1962	1963	1964	1965	1966	1967	1968	1969	1970	1971	1972	1973	1974	1975	1976	1977	1978
China (million ton)	0	0	0	0	0	0	0	0	0	0	0	0	0.04187	0.04611	0.034402	0.003	0.0038	0.0038	0.005018	0.00862	0.01221	0.01581	0.01941	0.023	0.0266	0.0512	0.0639	0.0907	0.1098	0.1851	0.1824	0.1245	0.1681	0.195	0.2175	0.2771	0.4576	0.4339	0.2945	0.3869	0.5273	0.6302	0.7088	0.6013	0.3288	0.5637	0.4075	0.5586	0.7787
The United States (million ton)	0.207776	0.161064	0.0951496	0.0952	0.0772	0.0672	0.204	0.2656	0.2602	0.2968	0.3742	0.560766	0.944746	1.66954	1.40875	0.898218	0.743216	1.03736	1.13117	1.0949	1.30384	1.5184	1.70065	2.2716	2.92113	2.9	3.12	3.12	2.89	3.64	3.65	3.49	4.15	4.52	4.98	5.24	5.54	5.8	5.74	6.54	6.35	6.35	6.11	6.66	6.88	5.14	5.8	6.03	5.96
EU27&UK (million ton)	0	0	0.120214	0.109646	0.164916	0.2548	0.3246	0.422274	0.529102	0.6574	0.6746	0.75203	0.820224	0.801818	0.6544	0.210764	0.196504	0.242966	0.32441	0.357686	0.392597	0.602828	0.738931	0.822062	0.946838	1.08813	1.18762	1.20325	1.23194	1.35247	1.57718	1.76688	1.8513	1.95263	2.10098	2.27471	2.54404	2.85461	2.86793	3.09922	3.39762	3.65702	3.65068	4.15406	4.94678	4.95857	5	5.255	5.226
ROW (million ton)	0.385632	0.298936	0.0906364	0.101754	0.041484	0.0196	0.1912	0.275126	0.368298	0.3998	0.5572	0.238308	0.99316	1.38654	1.24845	0.626018	0.64048	0.883874	1.0694	1.1588	1.29135	1.44296	1.641	1.81334	2.29543	2.88067	3.06848	3.03605	3.54826	3.78243	4.56042	5.02862	5.0206	5.52237	5.80711	6.11072	6.62378	7.61498	8.29757	9.17388	10.5251	12.1628	13.0305	14.9846	16.3444	15.4377	15.9925	17.8564	17.8353
World (million ton)	0.593408	0.46	0.306	0.3066	0.2836	0.3416	0.7198	0.963	1.1576	1.354	1.606	1.5511	2.8	3.904	3.346	1.738	1.584	2.168	2.53	2.62	3	3.58	4.1	4.93	6.19	6.92	7.44	7.45	7.78	8.96	9.97	10.41	11.19	12.19	13.1056	13.9025	15.1654	16.7035	17.2	19.2	20.8	22.8	23.5	26.4	28.5	26.1	27.2	29.7	29.8
* Estimated red mud production from 1930 to 2020, based on primary alumina production and red mud output.
Alumina production*
Year	1930	1931	1932	1933	1934	1935	1936	1937	1938	1939	1940	1941	1942	1943	1944	1945	1946	1947	1948	1949	1950	1951	1952	1953	1954	1955	1956	1957	1958	1959	1960	1961	1962	1963	1964	1965	1966	1967	1968	1969	1970	1971	1972	1973	1974	1975	1976	1977	1978
China (million ton)													0.04187	0.04611	0.034402	0.003	0.0038	0.0038	0.005018	0.00862	0.01221	0.01581	0.01941	0.023	0.0266	0.0512	0.0639	0.0907	0.1098	0.1851	0.1824	0.1245	0.1681	0.195	0.2175	0.2771	0.4576	0.4339	0.2945	0.3869	0.5273	0.6302	0.7088	0.6013	0.3288	0.5637	0.4075	0.5586	0.7787
The United States (million ton)*	0.207776	0.161064	0.0951496	0.0952	0.0772	0.0672	0.204	0.2656	0.2602	0.2968	0.3742	0.560766	0.944746	1.66954	1.40875	0.898218	0.743216	1.03736	1.13117	1.0949	1.30384	1.5184	1.70065	2.2716	2.92113	2.9	3.12	3.12	2.89	3.64	3.65	3.49	4.15	4.52	4.98	5.24	5.54	5.8	5.74	6.54	6.35	6.35	6.11	6.66	6.88	5.14	5.8	6.03	5.96
EU27&UK (million ton)*	0	0	0.120214	0.109646	0.164916	0.2548	0.3246	0.422274	0.529102	0.6574	0.6746	0.75203	0.820224	0.801818	0.6544	0.210764	0.196504	0.242966	0.32441	0.357686	0.392597	0.602828	0.738931	0.822062	0.946838	1.08813	1.18762	1.20325	1.23194	1.35247	1.57718	1.76688	1.8513	1.95263	2.10098	2.27471	2.54404	2.85461	2.86793	3.09922	3.39762	3.65702	3.65068	4.15406	4.94678	4.95857	5	5.255	5.226
ROW (million ton)*	0.385632	0.298936	0.0906364	0.101754	0.041484	0.0196	0.1912	0.275126	0.368298	0.3998	0.5572	0.238308	0.99316	1.38654	1.24845	0.626018	0.64048	0.883874	1.0694	1.1588	1.29135	1.44296	1.641	1.81334	2.29543	2.88067	3.06848	3.03605	3.54826	3.78243	4.56042	5.02862	5.0206	5.52237	5.80711	6.11072	6.62378	7.61498	8.29757	9.17388	10.5251	12.1628	13.0305	14.9846	16.3444	15.4377	15.9925	17.8564	17.8353
World (million ton)	0.593408	0.46	0.306	0.3066	0.2836	0.3416	0.7198	0.963	1.1576	1.354	1.606	1.5511	2.8	3.904	3.346	1.738	1.584	2.168	2.53	2.62	3	3.58	4.1	4.93	6.19	6.92	7.44	7.45	7.78	8.96	9.97	10.41	11.19	12.19	13.1056	13.9025	15.1654	16.7035	17.2	19.2	20.8	22.8	23.5	26.4	28.5	26.1	27.2	29.7	29.8
* Alumina production from 1955 to 2020 is from United States Geological Survey (USGS).Bauxite and Alumina Statistics and Information. https://www.usgs.gov/centers/national-minerals-information-center/bauxite-and-alumina-statistics-and-information
The industrial production of alumina began with the development of the Bayer process, which was invented by Carl Josef Bayer in 1888. This process became the primary method for extracting alumina from bauxite and has been widely used since its invention, contributing significantly to the industrial production of aluminum during the late 19th and early 20th centuries. The Bayer process involves di…
	The value of alumina production is estimated based on aluminum production. The shaded area in the data represents the estimated range. Source: Tabereaux A. T., Peterson R. D. Aluminum Production[M]//Treatise on Process Metallurgy. Elsevier, 2024: 625-676.
Average RM/Alumina
Year	1930	1931	1932	1933	1934	1935	1936	1937	1938	1939	1940	1941	1942	1943	1944	1945	1946	1947	1948	1949	1950	1951	1952	1953	1954	1955	1956	1957	1958	1959	1960	1961	1962	1963	1964	1965	1966	1967	1968	1969	1970	1971	1972	1973	1974	1975	1976	1977	1978
Average rate of RM/Alumina production	1	1	1	1	1	1	1	1	1	1	1	1	1	1	1	1	1	1	1	1	1	1	1	1	1	1	1	1	1	1	1	1	1	1	1	1	1	1	1	1	1	1	1	1	1	1	1	1	1
* The rate of red mud (RM) production to alumina production is approximately 0.6 to 1.8 (average 1). Data sourced from Liu, X. & Zhang, N. Utilization of Red Mud in Cement Production: A Review. Waste Management and Research, vol. 29, Preprint at https://doi.org/10.1177/0734242X11407653 (2011), and K., S. C., S., K. & Sahile, K. Utilization of Red Mud-Fly Ash Reinforced with Cement in Road Constru…
[truncated: 42 more columns]

## Sheet: Data S5
Supplementary Data 5: Estimates of Cement waste (CW) production by region
Cement waste (CW) production*
Year		1930	1931	1932	1933	1934	1935	1936	1937	1938	1939	1940	1941	1942	1943	1944	1945	1946	1947	1948	1949	1950	1951	1952	1953	1954	1955	1956	1957	1958	1959	1960	1961	1962	1963	1964	1965	1966	1967	1968	1969	1970	1971	1972	1973	1974	1975	1976	1977
China (million ton)	CKD	0.0222736	0.0235593	0.00946943	0.0133164	0.0112943	0.010012	0.022194	0.039456	0.0406396	0.0660887	0.0716372	0.0586464	0.077531	0.0758663	0.0580935	0.020961	0.0102614	0.0300207	0.0377298	0.0600717	0.0212076	0.0639289	0.10094	0.191366	0.226872	0.221943	0.316734	0.335719	0.458681	0.605163	0.665828	0.493203	0.443885	0.493203	0.517866	0.547551	0.548838	0.401902	0.456469	0.505543	0.50459	0.604122	0.701417	1.23285	1.23285	1.48067	2.86275	3.25367
	waste mortar	0.0414675	0.0438612	0.0176296	0.0247916	0.021027	0.0186396	0.0413194	0.0734566	0.0756603	0.12304	0.13337	0.109184	0.144342	0.141243	0.108155	0.0390238	0.019104	0.0558906	0.0702429	0.111838	0.0394829	0.119019	0.187924	0.356273	0.422376	0.413199	0.589675	0.625021	0.853944	1.12665	1.2396	0.918214	0.826398	0.918214	0.964131	1.30175	1.32045	0.868278	1.01863	1.08436	1.06633	1.40606	1.80602	2.81041	3.13302	3.66474	6.07312	7.04031
	waste concrete	0.0387935	0.0410329	0.0164928	0.0231929	0.019671	0.0174377	0.0386549	0.0687198	0.0707814	0.115106	0.124769	0.102143	0.135034	0.132135	0.10118	0.0365074	0.017872	0.0522865	0.0657133	0.104626	0.0369369	0.111344	0.175806	0.333299	0.395139	0.386554	0.55165	0.584717	0.798878	1.054	1.15966	0.859004	0.773108	0.859004	0.901959	2.39864	2.48429	1.31431	1.65891	1.6132	1.52835	2.492	3.78132	4.78369	6.43468	7.22626	8.79063	10.6966
The United States (million ton)	CKD	1.69437	1.31683	0.802508	0.664693	0.815186	0.808359	1.18249	1.22746	1.11417	1.29631	1.38002	1.73511	1.92675	1.40606	0.957988	1.08415	1.73129	1.96968	2.17154	2.21337	2.39384	2.59345	2.62657	2.78262	2.86774	3.27376	3.4667	3.26173	3.39268	3.69813	3.47354	3.5203	3.6586	3.82986	4.00638	4.04236	4.17672	4.01118	4.28347	4.33142	4.12527	4.49037	4.62714	4.84142	4.58242	3.85454	4.11841	4.42596
	waste mortar	2.16389	1.68173	1.02489	0.848882	1.04108	1.03236	1.51016	1.56759	1.42291	1.65552	1.76243	2.21591	2.46066	1.79568	1.22345	1.38458	2.21103	2.51548	2.77328	2.82671	3.05718	3.31211	3.3544	3.5537	3.66241	4.18093	4.42733	4.16557	4.3328	4.72289	4.43606	4.49578	4.67241	4.89113	5.11656	5.16251	5.3341	5.1227	5.47043	5.53167	5.26839	5.73466	5.90934	6.183	5.85222	4.92265	5.25964	5.65241
	waste concrete	2.78784	2.16665	1.32041	1.09365	1.34127	1.33004	1.94561	2.0196	1.8332	2.13288	2.27062	2.85487	3.17019	2.31346	1.57623	1.78381	2.84858	3.24081	3.57295	3.64178	3.93871	4.26714	4.32164	4.57839	4.71845	5.38649	5.70393	5.3667	5.58215	6.08472	5.71519	5.79213	6.01969	6.30147	6.59191	6.65111	6.87217	6.59981	7.04782	7.1267	6.78752	7.38823	7.61327	7.96584	7.53969	6.34208	6.77624	7.28226
EU27&UK (million ton)	CKD	2.26604	2.33586	1.93344	1.92755	2.15694	2.30267	2.36215	2.58373	2.45162	0.853405	0.241706	2.0655	1.53998	1.71126	0.868263	0.749874	1.3847	1.90119	2.5489	3.10122	2.79303	3.09169	3.38672	3.4285	3.93004	4.31252	4.56064	4.77507	4.96952	5.55367	5.97142	6.52977	6.8644	7.93723	9.14521	9.5882	9.93354	11.7407	12.4389	13.0098	20.8266	14.1717	14.9922	15.901	15.9027	15.5105	16.0342	16.6589
	waste mortar	2.67678	2.75926	2.2839	2.27694	2.54791	2.72006	2.79031	3.05206	2.89601	1.0081	0.285518	2.4399	1.81912	2.02145	1.02565	0.885797	1.63569	2.24581	3.01092	3.66335	3.2993	3.65209	4.0006	4.04995	4.64241	5.09422	5.38731	5.64061	5.87031	6.56034	7.05381	7.71336	8.10866	9.37595	10.8029	11.3262	11.7341	13.8688	14.6935	15.368	24.6017	16.7405	17.7097	18.7832	18.7852	18.322	18.9406	19.6785
	waste concrete	1.77358	1.82822	1.51326	1.50865	1.68819	1.80225	1.8488	2.02223	1.91883	0.667941	0.189178	1.61662	1.20531	1.33937	0.67957	0.586909	1.08377	1.48802	1.99497	2.42725	2.18604	2.41979	2.65071	2.68341	3.07596	3.37531	3.56951	3.73734	3.88953	4.34673	4.67369	5.1107	5.37262	6.21229	7.15775	7.50447	7.77476	9.18916	9.73561	10.1825	16.3005	11.0919	11.7341	12.4454	12.4467	12.1397	12.5496	13.0385
ROW (million ton)	CKD	0.686867	1.19713	0.54554	0.639508	0.977508	1.38182	0.589396	1.83021	2.39362	4.61361	4.27144	2.18247	1.9654	1.66827	1.99839	1.60282	1.846	1.94256	2.18075	2.46437	4.10609	4.69615	5.19813	6.15859	6.73796	7.54587	8.28953	9.19138	9.83517	11.0393	12.5115	13.3951	14.9178	14.8794	16.1624	16.9588	18.8325	18.3561	19.9042	21.3086	14.4355	23.296	27.6599	28.7035	29.1385	30.0869	29.5221	32.6747
	waste mortar	0.545579	0.950879	0.433323	0.507962	0.776437	1.09758	0.468158	1.45374	1.90126	3.6646	3.39281	1.73354	1.56112	1.32511	1.58732	1.27312	1.46628	1.54298	1.73217	1.95745	3.26148	3.73016	4.12888	4.89178	5.35198	5.9937	6.58439	7.30073	7.81209	8.76852	9.93793	10.6397	11.8492	11.8187	12.8378	13.4704	14.9587	14.5803	15.8099	16.9255	13.7987	22.5694	23.823	24.971	26.4643	28.5907	25.451	32.1688
	waste concrete	0.438934	0.76501	0.348621	0.408671	0.624666	0.883036	0.376647	1.16957	1.52962	2.94828	2.72961	1.39468	1.25597	1.06609	1.27705	1.02426	1.17967	1.24137	1.39358	1.57483	2.62395	3.00102	3.32181	3.93558	4.30582	4.8221	5.29733	5.87365	6.28506	7.05453	7.99535	8.55999	9.53304	9.50852	10.3284	10.8373	12.0347	11.7303	12.7196	13.617	33.2044	56.6805	36.7214	40.6688	52.7469	67.4681	39.4424	84.7757
World (million ton)	CKD	4.66955	4.87337	3.29096	3.24507	3.96093	4.50286	4.15623	5.68085	6.00005	6.82941	5.9648	6.04173	5.50967	4.86146	3.88273	3.4578	4.97225	5.84345	6.93892	7.83903	9.31417	10.4452	11.3124	12.5611	13.7626	15.3541	16.6336	17.5639	18.6561	20.8962	22.6223	23.9384	25.8847	27.1397	29.8318	31.1369	33.4916	34.5099	37.083	39.1554	39.892	42.5622	47.9807	50.6788	50.8564	50.9327	52.5374	57.0132
	waste mortar	5.42772	5.43573	3.75974	3.65858	4.38645	4.86864	4.80995	6.14685	6.29583	6.45125	5.57412	6.49854	5.98525	5.28349	3.94457	3.58252	5.33211	6.36016	7.58662	8.55935	9.65744	10.8134	11.6718	12.8517	14.0792	15.682	16.9887	17.7319	18.8691	21.1784	22.6674	23.7671	25.4567	27.004	29.7214	31.2608	33.3474	34.4401	36.9925	38.9095	44.7351	46.4507	49.2481	52.7476	54.2348	55.5	55.7243	64.5401
	waste concrete	5.03914	4.80091	3.19878	3.03417	3.67379	4.03276	4.20971	5.28012	5.35243	5.8642	5.31418	5.96832	5.7665	4.85106	3.63403	3.43149	5.12989	6.02249	7.02722	7.74849	8.78564	9.7993	10.47	11.5307	12.4954	13.9705	15.1224	15.5624	16.5556	18.54	19.5439	20.3218	21.6984	22.8813	24.98	27.3915	29.1659	28.8336	31.1619	32.5394	57.8208	77.6526	59.8501	65.8637	79.1679	93.1761	67.5589	115.793
*Cement waste primarily includes cement kiln dust, waste concrete, and waste mortar. Data on cement waste production from 1930 to 2020 is sourced from Xi, F. et al. Substantial global carbon uptake by cement carbonation. Nat Geosci 9, 880–883, 2016, and Huang, Z. et al. Global carbon uptake of cement carbonation accounts 1930-2021. Earth Syst. Sci. Data, 2023.
Cement production*
Year	1930	1931	1932	1933	1934	1935	1936	1937	1938	1939	1940	1941	1942	1943	1944	1945	1946	1947	1948	1949	1950	1951	1952	1953	1954	1955	1956	1957	1958	1959	1960	1961	1962	1963	1964	1965	1966	1967	1968	1969	1970	1971	1972	1973	1974	1975	1976	1977	1978
China (million ton)	0.451614	0.477683	0.192	0.27	0.229	0.203	0.45	0.8	0.824	1.34	1.4525	1.1891	1.572	1.53825	1.17789	0.425	0.208057	0.608692	0.765	1.218	0.43	1.29621	2.04664	3.88009	4.6	4.50006	6.42203	6.80696	9.30012	12.2701	13.5002	10.0001	9.00011	10.0001	10.5001	11.102	11.1281	8.14888	9.25526	10.2503	10.231	12.249	14.2218	24.9969	24.9969	30.0217	58.0444	65.9706	76.6841
The United States (million ton)*	27.798	21.604	13.166	10.905	13.374	13.262	19.4	20.1377	18.2792	21.2673	22.6407	28.4663	31.6105	23.0679	15.7168	17.7867	28.4036	32.3147	35.6265	36.3128	39.2735	42.5483	43.0917	45.6519	47.0484	53.7095	56.8749	53.5122	55.6605	60.6717	56.9871	57.7542	60.0233	62.833	65.729	66.3193	68.5235	65.8078	70.2749	71.0615	67.6794	73.6693	75.9132	79.4287	75.1794	63.2379	67.567	72.6126	77.5304
EU27&UK (million ton)*	35.1792	37.1481	27.585	27.767	33.75	37.729	38.642	42.8267	47.0476	49.1331	42.6526	40.1516	34.0763	35.9311	24.2072	19.0451	31.0182	37.6757	48.0961	56.8151	65.7174	75.8167	83.7322	92.3346	100.02	113.246	119.208	126.867	134.476	152.159	167.748	184.566	197.66	208.22	232.336	243.57	260.104	272.766	281.04	292.388	316.207	329.754	346.513	364.98	369.812	370.053	382.697	393.577	403.351
ROW (million ton)*	7.5378	12.396	7.765	8.635	10.947	14.206	4.30804	18.9356	19.7493	21.2597	14.2542	18.1929	13.6413	10.6628	13.7981	12.2433	12.8701	15.201	17.5124	20.6541	27.5791	29.3387	32.1294	36.1333	43.2318	45.8445	52.8952	59.7137	63.0637	69.1991	78.2648	80.8796	91.8163	96.9475	107.035	112.408	124.444	133.077	154.63	169.4	177.682	174.327	224.352	232.595	233.212	238.887	227.092	264.94	295.434
World (million ton)	70.9666	71.6258	48.708	47.577	58.3	65.4	62.8	82.7	85.9	93	81	88	80.9	71.2	54.9	49.5	72.5	85.8	102	115	133	149	161	178	194.9	217.3	235.4	246.9	262.5	294.3	316.5	333.2	358.5	378	415.6	433.4	464.2	479.8	515.2	543.1	571.8	590	661	702	703.2	702.2	735.4	797.1	853
* Cement production from 1930 to 2019 is from USGS. Cement Statistics and Information. http://minerals.usgs.gov/minerals/pubs/commodity/cement/index.html (2020).
Cement production in world total from 2020 to 2021 is from USGS，https://pubs.usgs.gov/periodicals/mcs2022/mcs2022-cement.pdf
Cement production in China from 2020 to 2021 is from China Statistical Yearbook 2021 and 2022
Cement production in the United States from 2020 to 2021 is from USGS. http://minerals.usgs.gov/minerals/pubs/commodity/cement/index.html (2022).
Cement production in the Europe and Central Eurasia from 2020 to 2021 is from Federal State Statistics Service of the Russian Federation.
[truncated: 43 more columns]

## Sheet: Data S6
Supplementary Data 6: Estimates of Lime kiln dust (LKD) production by region
Lime kiln dust (LKD) production*
Year	1930	1931	1932	1933	1934	1935	1936	1937	1938	1939	1940	1941	1942	1943	1944	1945	1946	1947	1948	1949	1950	1951	1952	1953	1954	1955	1956	1957	1958	1959	1960	1961	1962	1963	1964	1965	1966	1967	1968	1969	1970	1971	1972	1973	1974	1975	1976	1977	1978
China (million ton)	8.12035	8.13707	8.15379	8.17051	8.18723	8.20395	8.22067	8.23739	8.25411	8.27083	8.28755	8.30427	8.32099	8.33771	8.35443	8.37115	8.38787	8.40459	8.42131	8.44244	8.45448	8.45907	8.45613	8.45347	8.45897	8.46829	8.47932	8.49496	8.5347	8.60555	8.69907	8.57223	8.55107	8.57903	8.79087	8.93574	9.09865	8.85432	8.75877	9.13275	9.547	9.7592	9.7366	9.7557	9.83341	10.1089	10.0234	10.0469	10.1045
The United States (million ton)	0.2945	0.2375	0.171	0.1995	0.209	0.2565	0.323	0.3515	0.285	0.3705	0.418	0.5225	0.5225	0.5605	0.5605	0.513	0.513	0.589	0.627	0.5415	0.646	0.7125	0.6935	0.836	0.741	0.9025	0.912	0.8835	0.798	1.0735	1.1115	1.14	1.1875	1.254	1.387	1.444	1.558	1.5485	1.6055	1.7385	1.7005	1.691	1.748	1.824	1.862	1.653	1.748	1.7195	1.7575
EU27&UK (million ton)	0.926812	0.819196	0.7345	0.768527	0.839085	0.878907	0.847891	0.873609	0.820536	0.942313	0.772735	0.739354	0.678254	0.682647	0.555661	0.312409	0.415621	0.44435	0.517601	0.570661	0.596803	0.616825	0.635073	0.600353	1.28528	1.94368	2.02983	2.1461	2.06452	2.41518	2.42509	2.46999	2.49619	3.09619	3.2546	3.23047	3.13291	3.28442	3.35267	3.49341	3.65267	3.57442	3.80306	4.01723	4.2039	3.81228	4.32869	4.27181	4.47942
ROW (million ton)	3.92194	3.84305	3.82551	3.89	3.89984	3.93874	4.12982	4.1562	4.06615	4.07753	4.25024	4.30238	4.4576	4.64481	4.63972	4.43368	4.16937	4.29988	4.35793	4.38975	4.67609	4.82326	4.87257	5.04155	4.44208	4.07524	4.11473	4.06134	3.98848	3.66584	3.93941	4.02029	4.04137	2.10981	3.1484	2.45053	2.71909	2.95708	3.11683	3.31809	3.86183	4.23458	4.13894	4.32377	4.3841	4.50972	4.18331	5.12369	5.16308
World (million ton)	13.2636	13.0368	12.8848	13.0285	13.1352	13.2781	13.5214	13.6187	13.4258	13.6612	13.7285	13.8685	13.9793	14.2257	14.1103	13.6302	13.4859	13.7378	13.9238	13.9444	14.3734	14.6117	14.6573	14.9314	14.9273	15.3897	15.5359	15.5859	15.3857	15.7601	16.1751	16.2025	16.2761	15.039	16.5809	16.0607	16.5086	16.6443	16.8338	17.6827	18.762	19.2592	19.4266	19.9207	20.2834	20.0839	20.2834	21.1619	21.5045
* Estimated Lime kiln dust production from 1930 to 2020, based on lime production and Lime kiln dust output.
Lime production
Year	1930	1931	1932	1933	1934	1935	1936	1937	1938	1939	1940	1941	1942	1943	1944	1945	1946	1947	1948	1949	1950	1951	1952	1953	1954	1955	1956	1957	1958	1959	1960	1961	1962	1963	1964	1965	1966	1967	1968	1969	1970	1971	1972	1973	1974	1975	1976	1977	1978
China (million ton)1,2	85.4773	85.6533	85.8293	86.0053	86.1813	86.3573	86.5333	86.7094	86.8854	87.0614	87.2374	87.4134	87.5894	87.7654	87.9414	88.1174	88.2934	88.4694	88.6454	88.8678	88.9946	89.0428	89.0119	88.9839	89.0417	89.1398	89.2559	89.4206	89.839	90.5847	91.5691	90.2339	90.0113	90.3055	92.5354	94.0605	95.7752	93.2033	92.1976	96.1342	100.495	102.728	102.491	102.692	103.51	106.409	105.509	105.757	106.364
The United States (million ton)3	3.1	2.5	1.8	2.1	2.2	2.7	3.4	3.7	3	3.9	4.4	5.5	5.5	5.9	5.9	5.4	5.4	6.2	6.6	5.7	6.8	7.5	7.3	8.8	7.8	9.5	9.6	9.3	8.4	11.3	11.7	12	12.5	13.2	14.6	15.2	16.4	16.3	16.9	18.3	17.9	17.8	18.4	19.2	19.6	17.4	18.4	18.1	18.5
EU27&UK (million ton)3	9.75591	8.62312	7.73158	8.08975	8.83247	9.25165	8.92516	9.19588	8.63722	9.91909	8.13405	7.78267	7.13951	7.18576	5.84906	3.28852	4.37496	4.67737	5.44844	6.00696	6.28214	6.4929	6.68497	6.3195	13.5293	20.4598	21.3666	22.5906	21.7318	25.4229	25.5273	25.9999	26.2757	32.5915	34.2589	34.0049	32.978	34.5728	35.2913	36.7727	38.4492	37.6255	40.0322	42.2866	44.2516	40.1293	45.5652	44.9664	47.1518
ROW (million ton)3	41.2836	40.4532	40.2686	40.9474	41.051	41.4604	43.4718	43.7495	42.8016	42.9213	44.7394	45.2882	46.9221	48.8928	48.8392	46.6703	43.8881	45.2619	45.873	46.2079	49.222	50.7712	51.2902	53.069	46.7587	42.8973	43.313	42.7509	41.984	38.5878	41.4675	42.3188	42.5407	22.2085	33.1411	25.7951	28.622	31.1272	32.8087	34.9273	40.6508	44.5745	43.5678	45.5134	46.1484	47.4707	44.0348	53.9336	54.3482
World (million ton)1	139.617	137.23	135.63	137.142	138.265	139.769	142.33	143.355	141.324	143.802	144.511	145.984	147.151	149.744	148.53	143.476	141.957	144.609	146.567	146.783	151.299	153.807	154.287	157.172	157.13	161.997	163.536	164.062	161.955	165.895	170.264	170.553	171.328	158.306	174.535	169.06	173.775	175.203	177.198	186.134	197.495	202.728	204.491	209.692	213.51	211.409	213.509	222.757	226.364
1.Lime production data from 1930 to 1995 and from 2015 to 2018 is sourced from Bing, L. et al. An investigation of the global uptake of CO2 by lime from 1930 to 2020. Earth Syst. Sci. Data 15, 2431–2444 (2023).
2.Lime production of China from 1996 to 2020 is from China Building Materials Industry Yearbook. https://data.cnki.net/yearBook/single?id=N2022040143
3.Lime production of the United States, EU27&UK, ROW from 1930 to 2020 is from United States Geological Survey (USGS). Lime Statistics and Information. https://www.usgs.gov/centers/national-minerals-information-center/lime-statistics-and-information
Average LKD/Lime
Year	1930	1931	1932	1933	1934	1935	1936	1937	1938	1939	1940	1941	1942	1943	1944	1945	1946	1947	1948	1949	1950	1951	1952	1953	1954	1955	1956	1957	1958	1959	1960	1961	1962	1963	1964	1965	1966	1967	1968	1969	1970	1971	1972	1973	1974	1975	1976	1977	1978
Average LKD/Lime production	0.095	0.095	0.095	0.095	0.095	0.095	0.095	0.095	0.095	0.095	0.095	0.095	0.095	0.095	0.095	0.095	0.095	0.095	0.095	0.095	0.095	0.095	0.095	0.095	0.095	0.095	0.095	0.095	0.095	0.095	0.095	0.095	0.095	0.095	0.095	0.095	0.095	0.095	0.095	0.095	0.095	0.095	0.095	0.095	0.095	0.095	0.095	0.095	0.095
* The rate of lime kiln dust (LKD) production to lime production is approximately 0.09 to 0.1. Data is sourced from the IPCC. 2006 IPCC Guidelines for National Greenhouse Gas Inventories. http://www.ipcc-nggip.iges.or.jp/public/2006gl/chinese/index.html, 2006.
[truncated: 42 more columns]

## Sheet: Data S7
Supplementary Data 7: Estimates of Calcium carbide slag (CCS) production by region
Calcium carbide slag (CCS) production*
Year	1930	1931	1932	1933	1934	1935	1936	1937	1938	1939	1940	1941	1942	1943	1944	1945	1946	1947	1948	1949	1950	1951	1952	1953	1954	1955	1956	1957	1958	1959	1960	1961	1962	1963	1964	1965	1966	1967	1968	1969	1970	1971	1972	1973	1974	1975	1976	1977	1978
China (million ton)	0.00313998	0.00314645	0.00315291	0.00315938	0.00316585	0.00317231	0.00317878	0.00318524	0.00319171	0.00319817	0.00320464	0.0032111	0.00321757	0.00322403	0.0032305	0.00323697	0.00324343	0.0032499	0.00325636	0.0036	0.0096	0.0288	0.0132	0.0204	0.0324	0.0348	0.0372	0.0588	0.0888	0.162	0.2916	0.234	0.2328	0.3048	0.3912	0.528	0.6732	0.5076	0.432	0.6708	0.8352	0.936	0.9756	1.0752	1.0956	1.1796	1.1556	1.1868	1.4856
The United States (million ton)	0.453149	0.437864	0.421016	0.402443	0.38197	0.359402	0.334525	0.307102	0.276873	0.243551	0.206819	0.166328	0.249708	0.438217	0.586977	0.452058	0.469944	0.439702	0.694549	0.588797	0.594427	0.708428	0.690622	0.751097	0.687098	0.842548	0.947233	0.928664	1.20263	1.23548	1.29612	1.06745	1.14826	1.06432	1.02905	0.653148	0.469407	0.416339	0.612762	0.736525	0.592384	0.563126	0.359524	0.209879	0.257837	0.202049	0.218223	0.242365	0.210687
EU27&UK (million ton)	0.786189	0.756836	0.724479	0.688811	0.649493	0.606152	0.558376	0.505712	0.447658	0.383664	0.313121	0.23536	0.324144	0.533715	0.581909	0.275296	0.380738	0.331718	0.573364	0.620506	0.549158	0.6133	0.632437	0.539382	1.19179	1.81456	2.10824	2.25581	3.11134	2.77961	2.82791	2.31281	2.41371	2.62785	2.41467	1.4612	0.943907	0.883069	1.2796	1.48	1.27244	1.19033	0.782204	0.462242	0.582126	0.465981	0.5404	0.602115	0.536989
ROW (million ton)	0.490762	0.469925	0.444941	0.414986	0.37907	0.336008	0.284378	0.222474	0.148253	0.059264	0.0691146	0.180659	0.268648	0.471194	0.572646	0.350659	0.380702	0.351456	0.577622	0.557221	0.55598	0.665194	0.665296	0.66804	0.809441	0.96932	1.11394	1.14254	1.54014	1.26512	1.41978	1.19121	1.25195	0.651235	0.897023	0.473856	0.408774	0.388205	0.526188	0.663844	0.695463	0.752728	0.567956	0.47843	0.527673	0.528175	0.491371	0.641346	0.696215
World (million ton)	1.73324	1.66777	1.59359	1.5094	1.4137	1.30474	1.18046	1.03847	0.875976	0.689677	0.592259	0.585558	0.845718	1.44635	1.74476	1.08125	1.23463	1.12613	1.84879	1.77012	1.70917	2.01572	2.00155	1.97892	2.72073	3.66123	4.20662	4.38582	5.94291	5.44222	5.83541	4.80547	5.04672	4.6482	4.73194	3.1162	2.49529	2.19521	2.85055	3.55117	3.39549	3.44219	2.68528	2.22575	2.46324	2.3758	2.40559	2.67263	2.92949
* Estimated calcium carbide slag production is estimated based on lime production, the proportion of lime used for calcium carbide production, and the output rate of calcium carbide slag.
Calcium carbide production
Year	1930	1931	1932	1933	1934	1935	1936	1937	1938	1939	1940	1941	1942	1943	1944	1945	1946	1947	1948	1949	1950	1951	1952	1953	1954	1955	1956	1957	1958	1959	1960	1961	1962	1963	1964	1965	1966	1967	1968	1969	1970	1971	1972	1973	1974	1975	1976	1977	1978
China (million ton)1	0.00261665	0.00262204	0.00262743	0.00263282	0.0026382	0.00264359	0.00264898	0.00265437	0.00265976	0.00266514	0.00267053	0.00267592	0.00268131	0.0026867	0.00269208	0.00269747	0.00270286	0.00270825	0.00271363	0.003	0.008	0.024	0.011	0.017	0.027	0.029	0.031	0.049	0.074	0.135	0.243	0.195	0.194	0.254	0.326	0.44	0.561	0.423	0.36	0.559	0.696	0.78	0.813	0.896	0.913	0.983	0.963	0.989	1.238
The United States (million ton)2	0.377624	0.364887	0.350846	0.335369	0.318308	0.299502	0.278771	0.255918	0.230728	0.202959	0.172349	0.138607	0.20809	0.365181	0.489147	0.376715	0.39162	0.366419	0.578791	0.490664	0.495356	0.590357	0.575518	0.625914	0.572582	0.702123	0.789361	0.773887	1.00219	1.02957	1.0801	0.889544	0.956885	0.886929	0.857542	0.54429	0.391172	0.346949	0.510635	0.613771	0.493654	0.469272	0.299603	0.174899	0.214864	0.168374	0.181852	0.201971	0.175573
EU27&UK (million ton)2	0.655158	0.630696	0.603732	0.574009	0.541244	0.505127	0.465314	0.421426	0.373048	0.31972	0.260934	0.196133	0.27012	0.444763	0.484924	0.229414	0.317282	0.276432	0.477804	0.517088	0.457631	0.511084	0.527031	0.449485	0.993155	1.51213	1.75687	1.87984	2.59278	2.31634	2.35659	1.92734	2.01143	2.18988	2.01222	1.21767	0.786589	0.735891	1.06633	1.23334	1.06037	0.991943	0.651836	0.385202	0.485105	0.388318	0.450333	0.501763	0.447491
ROW (million ton)2	0.408969	0.391604	0.370784	0.345822	0.315892	0.280007	0.236982	0.185395	0.123544	0.0493867	0.0575955	0.15055	0.223874	0.392662	0.477205	0.292216	0.317252	0.29288	0.481351	0.464351	0.463317	0.554328	0.554413	0.5567	0.674534	0.807767	0.928284	0.952116	1.28345	1.05427	1.18315	0.992674	1.04329	0.542696	0.747519	0.39488	0.340645	0.323504	0.43849	0.553204	0.579552	0.627273	0.473297	0.398692	0.439728	0.440146	0.409475	0.534455	0.580179
World (million ton)	1.44437	1.38981	1.32799	1.25783	1.17808	1.08728	0.983715	0.865395	0.72998	0.574731	0.493549	0.487965	0.704765	1.20529	1.45397	0.901042	1.02886	0.938438	1.54066	1.4751	1.4243	1.67977	1.66796	1.6491	2.26727	3.05102	3.50551	3.65485	4.95242	4.53518	4.86285	4.00456	4.2056	3.8735	3.94328	2.59684	2.07941	1.82934	2.37546	2.95931	2.82957	2.86849	2.23774	1.85479	2.0527	1.97984	2.00466	2.22719	2.44124
1.Data on calcium carbide production in China from 1949 to 2020 is sourced from the China Chemical Industry Yearbook.
2.Calcium carbide production in the US, EU27 & UK and ROW is estimated based on lime production, the proportion of lime used to produce calcium carbide, and the output of calcium carbide per ton of lime.
	The production of calcium carbide from 1930 to 1948 was derived from fitting based on the amount of lime used for producing calcium carbide in China.
	The production of calcium carbide in the US, the EU27 & UK, and ROW from 1930 to 1940 was estimated using the ARIMA model.
Average CCS/Calcium carbide
Year	1930	1931	1932	1933	1934	1935	1936	1937	1938	1939	1940	1941	1942	1943	1944	1945	1946	1947	1948	1949	1950	1951	1952	1953	1954	1955	1956	1957	1958	1959	1960	1961	1962	1963	1964	1965	1966	1967	1968	1969	1970	1971	1972	1973	1974	1975	1976	1977	1978
Average rate of CS/Calcium carbide production	1.2	1.2	1.2	1.2	1.2	1.2	1.2	1.2	1.2	1.2	1.2	1.2	1.2	1.2	1.2	1.2	1.2	1.2	1.2	1.2	1.2	1.2	1.2	1.2	1.2	1.2	1.2	1.2	1.2	1.2	1.2	1.2	1.2	1.2	1.2	1.2	1.2	1.2	1.2	1.2	1.2	1.2	1.2	1.2	1.2	1.2	1.2	1.2	1.2
* The rate of carbide slag (CS) production to calcium carbide production is approximately 1 to 1.45. Data is sourced from Niu, Y.H., Feng, P.J. Application present status of carbide slag. China Chlor-Alkali 11: 35-38 (2010); Resourcification Utilization Routes for Carbide Slag. Chemical Production and Technology 14(1): 47-51 (2007); Yuan, K. Comprehensive utilization status and policy orientation…
The ratio of lime to produce calcium carbide
	1930	1931	1932	1933	1934	1935	1936	1937	1938	1939	1940	1941	1942	1943	1944	1945	1946	1947	1948	1949	1950	1951	1952	1953	1954	1955	1956	1957	1958	1959	1960	1961	1962	1963	1964	1965	1966	1967	1968	1969	1970	1971	1972	1973	1974	1975	1976	1977	1978
China (million ton)1												0	0	0	0	0	0	0	0	3.30828e-05	8.80953e-05	0.000264143	0.000121107	0.000187225	0.000297164	0.000318825	0.000340369	0.000537013	0.000807222	0.00146051	0.00260066	0.00211783	0.00211218	0.00275642	0.00345251	0.00458429	0.00574031	0.0044477	0.00382657	0.00569849	0.00678722	0.00744098	0.00777379	0.00855065	0.00864403	0.00905315	0.00894462	0.00916462	0.0114065
The United States (million ton)2												0.0252012	0.0378345	0.061895	0.0829063	0.0697621	0.0725222	0.0590998	0.0876956	0.0860815	0.0728465	0.0787142	0.0788381	0.0711266	0.0734079	0.0739077	0.0822251	0.0832136	0.119308	0.0911123	0.0923165	0.0741287	0.0765508	0.0671916	0.0587357	0.0358085	0.023852	0.0212852	0.0302151	0.0335394	0.0275784	0.0263636	0.0162828	0.00910931	0.0109624	0.00967666	0.00988328	0.0111586	0.00949042
EU27&UK (million ton)3												0.0252012	0.0378345	0.061895	0.0829063	0.0697621	0.0725222	0.0590998	0.0876956	0.0860815	0.0728465	0.0787142	0.0788381	0.0711266	0.0734079	0.0739077	0.0822251	0.0832136	0.119308	0.0911123	0.0923165	0.0741287	0.0765508	0.0671916	0.0587357	0.0358085	0.023852	0.0212852	0.0302151	0.0335394	0.0275784	0.0263636	0.0162828	0.00910931	0.0109624	0.00967666	0.00988328	0.0111586	0.00949042
ROW (million ton)4												0.00332426	0.00477118	0.00803108	0.00977096	0.00626128	0.00722865	0.00647077	0.0104931	0.0100492	0.0094128	0.0109182	0.0108093	0.0104901	0.0144259	0.0188303	0.021432	0.0222712	0.0305699	0.0273213	0.0285321	0.023457	0.0245245	0.0244364	0.0225557	0.0153083	0.0119015	0.010393	0.0133651	0.0158387	0.0142569	0.0140725	0.0108635	0.00875988	0.00952855	0.00927195	0.0092989	0.0099095	0.0106752
1.The proportion of lime used to produce calcium carbide is according to the China Building Materials Industry Yearbook.
2.The ratio of lime to produce calcium carbide from 1941 to 2020 is sourced from the United States Geological Survey (USGS).
3.Data for the EU27 & UK is not available and is referenced to US data.
4.For the rest of the world (ROW), the estimates are based on the weighted average of data from China, the United States, and the EU27 & UK.
Lime production
	1930	1931	1932	1933	1934	1935	1936	1937	1938	1939	1940	1941	1942	1943	1944	1945	1946	1947	1948	1949	1950	1951	1952	1953	1954	1955	1956	1957	1958	1959	1960	1961	1962	1963	1964	1965	1966	1967	1968	1969	1970	1971	1972	1973	1974	1975	1976	1977	1978
China (million ton)1,2	85.4773	85.6533	85.8293	86.0053	86.1813	86.3573	86.5333	86.7094	86.8854	87.0614	87.2374	87.4134	87.5894	87.7654	87.9414	88.1174	88.2934	88.4694	88.6454	88.8678	88.9946	89.0428	89.0119	88.9839	89.0417	89.1398	89.2559	89.4206	89.839	90.5847	91.5691	90.2339	90.0113	90.3055	92.5354	94.0605	95.7752	93.2033	92.1976	96.1342	100.495	102.728	102.491	102.692	103.51	106.409	105.509	105.757	106.364
The United States (million ton)3	3.1	2.5	1.8	2.1	2.2	2.7	3.4	3.7	3	3.9	4.4	5.5	5.5	5.9	5.9	5.4	5.4	6.2	6.6	5.7	6.8	7.5	7.3	8.8	7.8	9.5	9.6	9.3	8.4	11.3	11.7	12	12.5	13.2	14.6	15.2	16.4	16.3	16.9	18.3	17.9	17.8	18.4	19.2	19.6	17.4	18.4	18.1	18.5
EU27&UK (million ton)3	9.75591	8.62312	7.73158	8.08975	8.83247	9.25165	8.92516	9.19588	8.63722	9.91909	8.13405	7.78267	7.13951	7.18576	5.84906	3.28852	4.37496	4.67737	5.44844	6.00696	6.28214	6.4929	6.68497	6.3195	13.5293	20.4598	21.3666	22.5906	21.7318	25.4229	25.5273	25.9999	26.2757	32.5915	34.2589	34.0049	32.978	34.5728	35.2913	36.7727	38.4492	37.6255	40.0322	42.2866	44.2516	40.1293	45.5652	44.9664	47.1518
ROW (million ton)3	41.2836	40.4532	40.2686	40.9474	41.051	41.4604	43.4718	43.7495	42.8016	42.9213	44.7394	45.2882	46.9221	48.8928	48.8392	46.6703	43.8881	45.2619	45.873	46.2079	49.222	50.7712	51.2902	53.069	46.7587	42.8973	43.313	42.7509	41.984	38.5878	41.4675	42.3188	42.5407	22.2085	33.1411	25.7951	28.622	31.1272	32.8087	34.9273	40.6508	44.5745	43.5678	45.5134	46.1484	47.4707	44.0348	53.9336	54.3482
World (million ton)1	139.617	137.23	135.63	137.142	138.265	139.769	142.33	143.355	141.324	143.802	144.511	145.984	147.151	149.744	148.53	143.476	141.957	144.609	146.567	146.783	151.299	153.807	154.287	157.172	157.13	161.997	163.536	164.062	161.955	165.895	170.264	170.553	171.328	158.306	174.535	169.06	173.775	175.203	177.198	186.134	197.495	202.728	204.491	209.692	213.51	211.409	213.509	222.757	226.364
1.Lime production data from 1930 to 1995 and from 2015 to 2018 is sourced from Bing, L. et al. An investigation of the global uptake of CO2 by lime from 1930 to 2020. Earth Syst. Sci. Data 15, 2431–2444 (2023).	Lime production is from Bing, L. et al. An investigation of the global uptake of CO2 by lime from 1930 to 2020. Earth Syst Sci Data 15, 2431–2444 (2023).
2.Lime production of China from 1996 to 2020 is from China Building Materials Industry Yearbook. https://data.cnki.net/yearBook/single?id=N2022040143
3.Lime production of the United States, EU27&UK, ROW from 1930 to 2020 is from United States Geological Survey (USGS). Lime Statistics and Information. https://www.usgs.gov/centers/national-minerals-information-center/lime-statistics-and-information
[truncated: 42 more columns]

## Sheet: Data S8
Supplementary Data 8: Estimates of Lime mud (LM) production by region
Lime mud (LM)) production*
Year	1930	1931	1932	1933	1934	1935	1936	1937	1938	1939	1940	1941	1942	1943	1944	1945	1946	1947	1948	1949	1950	1951	1952	1953	1954	1955	1956	1957	1958	1959	1960	1961	1962	1963	1964	1965	1966	1967	1968	1969	1970	1971	1972	1973	1974	1975	1976	1977	1978
China (million ton)	0.08	0.08	0.08	0.08	0.08	0.08	0.0894	0.0975795	0.106507	0.116252	0.126888	0.138498	0.151169	0.165	0.154218	0.144141	0.134722	0.125919	0.11769	0.11	0.14	0.24	0.37	0.43	0.52	0.58	0.73	0.91	1.22	1.7	1.8	1.1	1.12	1.283	1.446	1.731	2.091	1.947	1.777	2.171	2.414	2.629	2.823	3.125	2.988	3.41	3.408	3.769	4.39
The United States (million ton)	31.5183	24.8387	18.4172	22.5746	22.8616	25.8416	29.6741	33.0426	29.2365	35.24	43.2696	36.7065	33.258	29.8977	29.3006	28.3664	31.6581	36.1488	37.9405	31.2183	33.5062	39.3704	36.7628	41.9694	39.7873	41.774	46.5069	46.813	39.3713	42.9255	47.065	42.3209	37.5768	33.687	35.7782	37.8665	40.7052	40.5046	44.1172	46.814	45.805	46.954	50.757	52.971	52.54	45.248	51.757	53.347	55.154
EU27&UK (million ton)	21.1041	18.1636	16.7245	18.3488	19.343	18.6547	16.4222	17.3393	17.8079	19.0129	17.0269	11.0992	9.26227	7.84496	6.28653	3.75532	5.15895	5.53086	6.41794	6.81339	6.48974	7.25942	7.268	6.57239	15.2588	20.195	23.5005	25.9972	23.4826	22.5015	24.0057	17.8828	18.4228	19.6301	20.2612	21.2248	22.2322	23.0975	25.0347	27.2709	28.3975	28.1318	29.693	32.2519	33.447	25.7776	32.633	33.1393	34.6101
ROW (million ton)	47.3356	36.8546	27.5213	33.98	34.3815	38.8903	46.3103	51.5914	45.0287	53.658	67.9972	57.6534	54.0225	50.2905	49.0654	45.4729	47.4459	55.0166	59.1002	49.4393	56.3492	67.9614	64.4817	74.7075	63.0027	59.3004	65.8038	64.9222	53.8933	51.7601	59.6605	54.2934	48.9262	30.6739	33.5596	35.7033	38.8149	39.4738	42.1867	45.8155	48.9666	49.7922	53.4018	59.0142	60.5319	52.5921	58.5002	60.8907	64.7796
World (million ton)	100.038	79.9369	62.743	74.9834	76.6662	83.4666	92.496	102.071	92.1795	108.027	128.421	105.598	96.6939	88.1982	84.8067	77.7388	84.3977	96.8221	103.576	87.5811	96.4851	114.831	108.882	123.679	118.569	121.849	136.541	138.642	117.967	118.887	132.531	115.597	106.046	85.274	91.045	96.5256	103.843	105.023	113.116	122.071	125.583	127.507	136.675	147.362	149.507	127.028	146.298	151.146	158.934
* Estimated lime mud production from 1930 to 2020, based on paper and paperboard production and lime mud output.
Paper and paperboard production
Year	1930	1931	1932	1933	1934	1935	1936	1937	1938	1939	1940	1941	1942	1943	1944	1945	1946	1947	1948	1949	1950	1951	1952	1953	1954	1955	1956	1957	1958	1959	1960	1961	1962	1963	1964	1965	1966	1967	1968	1969	1970	1971	1972	1973	1974	1975	1976	1977	1978
China (million ton)1	0.08	0.08	0.08	0.08	0.08	0.08	0.0894	0.0975795	0.106507	0.116252	0.126888	0.138498	0.151169	0.165	0.154218	0.144141	0.134722	0.125919	0.11769	0.11	0.14	0.24	0.37	0.43	0.52	0.58	0.73	0.91	1.22	1.7	1.8	1.1	1.12	1.283	1.446	1.731	2.091	1.947	1.777	2.171	2.414	2.629	2.823	3.125	2.988	3.41	3.408	3.769	4.39
The United States (million ton)2	31.5183	24.8387	18.4172	22.5746	22.8616	25.8416	29.6741	33.0426	29.2365	35.24	43.2696	36.7065	33.258	29.8977	29.3006	28.3664	31.6581	36.1488	37.9405	31.2183	33.5062	39.3704	36.7628	41.9694	39.7873	41.774	46.5069	46.813	39.3713	42.9255	47.065	42.3209	37.5768	33.687	35.7782	37.8665	40.7052	40.5046	44.1172	46.814	45.805	46.954	50.757	52.971	52.54	45.248	51.757	53.347	55.154
EU27&UK (million ton)2	21.1041	18.1636	16.7245	18.3488	19.343	18.6547	16.4222	17.3393	17.8079	19.0129	17.0269	11.0992	9.26227	7.84496	6.28653	3.75532	5.15895	5.53086	6.41794	6.81339	6.48974	7.25942	7.268	6.57239	15.2588	20.195	23.5005	25.9972	23.4826	22.5015	24.0057	17.8828	18.4228	19.6301	20.2612	21.2248	22.2322	23.0975	25.0347	27.2709	28.3975	28.1318	29.693	32.2519	33.447	25.7776	32.633	33.1393	34.6101
ROW (million ton)2	47.3356	36.8546	27.5213	33.98	34.3815	38.8903	46.3103	51.5914	45.0287	53.658	67.9972	57.6534	54.0225	50.2905	49.0654	45.4729	47.4459	55.0166	59.1002	49.4393	56.3492	67.9614	64.4817	74.7075	63.0027	59.3004	65.8038	64.9222	53.8933	51.7601	59.6605	54.2934	48.9262	30.6739	33.5596	35.7033	38.8149	39.4738	42.1867	45.8155	48.9666	49.7922	53.4018	59.0142	60.5319	52.5921	58.5002	60.8907	64.7796
World (million ton)	100.038	79.9369	62.743	74.9834	76.6662	83.4666	92.496	102.071	92.1795	108.027	128.421	105.598	96.6939	88.1982	84.8067	77.7388	84.3977	96.8221	103.576	87.5811	96.4851	114.831	108.882	123.679	118.569	121.849	136.541	138.642	117.967	118.887	132.531	115.597	106.046	85.274	91.045	96.5256	103.843	105.023	113.116	122.071	125.583	127.507	136.675	147.362	149.507	127.028	146.298	151.146	158.934
1.Paper and paperboard production of China from 1949 to 2020 is from China statistical yearbook. Paper and paperboard production in 1936 and 1943 are from Almanac of China Paper Industry
2.Data on paper and paperboard production in the U.S., EU27 & UK, and the rest of the world (ROW) from 1961 to 2020 is sourced from the Food and Agriculture Organization of the United Nations (FAO).
	The production of paper and paperboard from 1930 to 1962 was derived from fitting based on the amount of lime used for producing calcium carbide in the U.S., EU27 & UK, and ROW.
	The data for the trend of China's paper and cardboard production in 1949 was derived from fitting.
Average LM/paper and paperboard*
Year	1930	1931	1932	1933	1934	1935	1936	1937	1938	1939	1940	1941	1942	1943	1944	1945	1946	1947	1948	1949	1950	1951	1952	1953	1954	1955	1956	1957	1958	1959	1960	1961	1962	1963	1964	1965	1966	1967	1968	1969	1970	1971	1972	1973	1974	1975	1976	1977	1978
Average rate of LM/Paper and paperboard production	1	1	1	1	1	1	1	1	1	1	1	1	1	1	1	1	1	1	1	1	1	1	1	1	1	1	1	1	1	1	1	1	1	1	1	1	1	1	1	1	1	1	1	1	1	1	1	1	1
* The rate of lime mud (LM) production to paper and paperboard production is approximately 0.5 to 1.5. Data is sourced from Han, Y.L., Feng, P., Fan, T.T., et al. Study on Reed MCC Preparation Process by Acid Hydrolysis. China Pulp & Paper 34(1): 71-74 (2015); He, W., Zhang, X.D., Wang, S.F. Study on Application of Wollastonite Synthesized by Paper White Sludge in Fast Firing Glazed Tile. Science…
[truncated: 42 more columns]

## Sheet: Data S9
Supplementary Data 9: Estimates of Yellow Phosphorus slag (YPS) production by region
Yellow Phosphorus slag (YPS) production*
Year	1930	1931	1932	1933	1934	1935	1936	1937	1938	1939	1940	1941	1942	1943	1944	1945	1946	1947	1948	1949	1950	1951	1952	1953	1954	1955	1956	1957	1958	1959	1960	1961	1962	1963	1964	1965	1966	1967	1968	1969	1970	1971	1972	1973	1974	1975	1976	1977	1978
China (million ton)																			0.00101021	0.00101021	0.00101021	0.00102638	0.00102638	0.00133429	0.00189777	0.00205276	0.00769784	0.0102638	0.0153957	0.0256595	0.0307913	0.0256595	0.0307913	0.0359232	0.0410551	0.046187	0.0513189	0.0513189	0.0502925	0.0513189	0.0858683	0.111124	0.131328	0.151532	0.151532	0.171737	0.189415	0.207094	0.222247
The United States (million ton)																0.877419	0.908813	1.15276	1.10529	1.27469	1.56051	2.20555	2.05659	2.70201	1.99558	2.96452	3.24721	3.46659	3.5753	3.66471	3.87706	4.1717	4.66446	4.5466	5.40512	5.70775	5.8438	5.43021	5.54812	6.12951	5.85559	5.00301	4.69191	5.22613	5.37397	5.14541	4.515	3.904	4.371
EU27&UK (million ton)																0.0274077	0.0307828	0.0236613	0.0213682	0.0155093	0.0231629	0.0535704	0.0415302	0.0369755	0.0249932	0.0346168	0.0229177	0.0267493	0.0448522	0.0297911	0.0239979	0.0281414	0.0320763	0.0271161	0.0149976	0.0117274	0.0102241	0.0137021	0.00920387	0.00596882	0.0158291	0.0112038	0.0122092	0.0166125	0.0162161	0.011535	0.0144595	0.0125893	0.00975917
ROW (million ton)																0.106103	0.14688	0.178857	0.197314	0.211542	0.224351	0.253253	0.277973	0.277146	0.31453	0.350551	0.345275	0.359992	0.39897	0.416601	0.4628	0.524577	0.546297	0.555276	0.674142	0.726724	0.753323	0.820956	0.916994	0.920175	0.93124	0.99688	1.06925	1.19305	1.30858	1.22431	1.18872	1.30983	1.40903
World (million ton)																1.01093	1.08648	1.35528	1.32498	1.50275	1.80903	2.5134	2.37712	3.01746	2.337	3.35174	3.6231	3.8636	4.03452	4.13676	4.39465	4.75007	5.27362	5.16492	6.13531	6.49239	6.65867	6.31619	6.52461	7.10697	6.88853	6.12222	5.9047	6.58733	6.8503	6.553	5.90759	5.43352	6.01203
* Estimated yellow phosphorus slag production from 1930 to 2020, based on estimated yellow phosphorus production and yellow phosphorus slag output.
Yellow Phosphorus production
Year	1930	1931	1932	1933	1934	1935	1936	1937	1938	1939	1940	1941	1942	1943	1944	1945	1946	1947	1948	1949	1950	1951	1952	1953	1954	1955	1956	1957	1958	1959	1960	1961	1962	1963	1964	1965	1966	1967	1968	1969	1970	1971	1972	1973	1974	1975	1976	1977	1978
China (million ton)1																			0.000112246	0.000112246	0.000112246	0.000114042	0.000114042	0.000148255	0.000210864	0.000228084	0.000855315	0.00114042	0.00171063	0.00285105	0.00342126	0.00285105	0.00342126	0.00399147	0.00456168	0.00513189	0.0057021	0.0057021	0.00558806	0.0057021	0.00954092	0.0123471	0.014592	0.0168369	0.0168369	0.0190818	0.0210461	0.0230104	0.0246941
The United States (million ton)2																0.097491	0.100979	0.128085	0.12281	0.141632	0.17339	0.245061	0.22851	0.300223	0.221731	0.329391	0.360801	0.385177	0.397256	0.40719	0.430784	0.463522	0.518273	0.505178	0.600569	0.634195	0.649311	0.603357	0.616458	0.681056	0.650621	0.55589	0.521323	0.580682	0.597108	0.571712	0.501667	0.433778	0.485667
EU27&UK (million ton)2																0.0030453	0.00342031	0.00262903	0.00237424	0.00172325	0.00257365	0.00595226	0.00461447	0.00410839	0.00277702	0.00384631	0.00254641	0.00297214	0.00498358	0.00331012	0.00266643	0.00312682	0.00356403	0.0030129	0.0016664	0.00130304	0.00113601	0.00152245	0.00102265	0.000663202	0.00175879	0.00124487	0.00135657	0.00184583	0.00180178	0.00128166	0.00160661	0.00139881	0.00108435
ROW (million ton)2																0.0117892	0.01632	0.019873	0.0219238	0.0235046	0.0249278	0.0281393	0.0308859	0.030794	0.0349477	0.0389501	0.0383639	0.0399991	0.04433	0.046289	0.0514222	0.0582864	0.0606997	0.0616974	0.0749047	0.0807472	0.0837026	0.0912174	0.101888	0.102242	0.103471	0.110764	0.118806	0.132561	0.145398	0.136035	0.13208	0.145537	0.156558
World (million ton)																0.112325	0.12072	0.150587	0.14722	0.166972	0.201004	0.279266	0.264125	0.335274	0.259667	0.372415	0.402567	0.429289	0.44828	0.45964	0.488294	0.527786	0.585958	0.57388	0.681702	0.721377	0.739852	0.701798	0.724957	0.789663	0.765392	0.680247	0.656078	0.731925	0.761145	0.728111	0.656399	0.603724	0.668004
1.Yellow phosphorus production in China is sourced from Gao, Y. F., 2018. Brilliant achievement of phosphate chemical industry in China in past 40 years and development trend.Phosphate & Compound Fertilizer, 033(012):23-26. doi: CNKI:SUN:LFYF.0.2018-12-007.2018. and Huajing Industry Research Institute. 2021. Analysis on supply and demand status and competition pattern of yellow phosphorus in Chin…
2.Since production data for yellow phosphorus is unavailable for the United States, the European Union, and other nations, we have estimated using phosphorus ore data and the ore-to-yellow-phosphorus production ratio. Data on phosphorus ore production from 1930 to 2020 has been obtained from the United States Geological Survey (USGS).
Phosphorus Rock production by region, 1930-2020
Year	1930	1931	1932	1933	1934	1935	1936	1937	1938	1939	1940	1941	1942	1943	1944	1945	1946	1947	1948	1949	1950	1951	1952	1953	1954	1955	1956	1957	1958	1959	1960	1961	1962	1963	1964	1965	1966	1967	1968	1969	1970	1971	1972	1973	1974	1975	1976	1977	1978
China (million ton)1	0.008	0.008	0.008	0.008	0.008	0.008	0.008	0.008	0.008	0.008	0.02	0.07	0.08	0.07	0.075	n.a.	n.a.	n.a.	0.02	0.02	0.02	0.02032	0.02032	0.026416	0.0375717	0.04064	0.1524	0.2032	0.3048	0.508	0.6096	0.508	0.6096	0.7112	0.8128	0.9144	1.016	1.016	0.99568	1.016	1.7	2.2	2.6	3	3	3.4	3.75	4.1	4.4
The United States (million ton)2	3.64881	2.61878	1.73843	2.39739	2.94461	3.26704	3.20988	3.51824	3.92224	4.05178	4.13317	5.00094	4.89604	5.45589	5.2832	5.48613	7.28354	9.25676	9.53837	9.01951	11.292	10.9474	11.5824	12.7039	14.0422	12.4615	15.999	14.1996	15.1171	16.1229	17.7963	18.8559	19.6921	20.1727	23.3274	26.7025	35.4239	36.0771	37.4205	34.2219	35.143	35.277	37.041	38.226	41.446	44.285	44.671	47.256	50.037
EU27&UK (million ton)2	0.222176	0.174188	0.128539	0.124226	0.112993	0.0921319	0.102057	0.122667	0.228	0.161134	0.297482	0.323288	0.49342	0.629234	0.452289	0.171369	0.246704	0.190002	0.184402	0.109741	0.167609	0.265901	0.233891	0.173846	0.175869	0.145514	0.112915	0.109568	0.189644	0.131066	0.110154	0.127198	0.135418	0.120311	0.0647263	0.054864	0.061976	0.0910336	0.0620776	0.0333248	0.095	0.079	0.096387	0.12151	0.125064	0.099278	0.143061	0.152387	0.111718
ROW (million ton)2	8.21128	5.02211	5.23691	5.09026	5.46867	5.7767	7.95754	8.43527	8.73264	8.66895	6.21195	4.84085	4.10404	3.38197	3.95918	5.30514	7.344	8.94283	9.86571	10.5771	11.2175	12.6627	13.8987	13.8573	15.7265	17.5276	17.2637	17.9996	19.9485	20.83	23.14	26.2289	27.3149	27.7638	33.7071	36.3362	37.6662	41.0478	45.8497	46.0087	46.562	49.844	53.4626	59.6525	65.4289	61.2157	59.4359	65.4916	70.4513
World (million ton)	12.0903	7.82307	7.11187	7.61987	8.53427	9.14387	11.2775	12.0842	12.8909	12.8899	10.6626	10.2351	9.5735	9.53709	9.76967	10.9626	14.8742	18.3896	19.6085	19.7263	22.6971	23.8963	25.7353	26.7614	29.9822	30.1752	33.528	32.512	35.56	37.592	41.656	45.72	47.752	48.768	57.912	64.008	74.168	78.232	84.328	81.28	83.5	87.4	93.2	101	110	109	108	117	125
1.Data from Gao, Y. F., 2018. Brilliant achievement of phosphate chemical industry in China in past 40 years and development trend.Phosphate ＆ Compound Fertilizer, 033(012):23-26. doi: CNKI:SUN:LFYF.0.2018-12-007.2018. ;Huajing Industry Research Institute. 2021. Analysis on supply and demand status and competition pattern of yellow phosphorus in China in 2020. [online] Available from: https://cai…
2.Data from BGS. British Geological Survey - World Minerals Statistics Archive
The proportion of phosphate rock used for the production of yellow phosphorus.
Year	1930	1931	1932	1933	1934	1935	1936	1937	1938	1939	1940	1941	1942	1943	1944	1945	1946	1947	1948	1949	1950	1951	1952	1953	1954	1955	1956	1957	1958	1959	1960	1961	1962	1963	1964	1965	1966	1967	1968	1969	1970	1971	1972	1973	1974	1975	1976	1977	1978
China1																0.0505107	0.0505107	0.0505107	0.0505107	0.0505107	0.0505107	0.0505107	0.0505107	0.0505107	0.0505107	0.0505107	0.0505107	0.0505107	0.0505107	0.0505107	0.0505107	0.0505107	0.0505107	0.0505107	0.0505107	0.0505107	0.0505107	0.0505107	0.0505107	0.0505107	0.0505107	0.0505107	0.0505107	0.0505107	0.0505107	0.0505107	0.0505107	0.0505107	0.0505107
USA2																0.159934	0.124776	0.124532	0.115878	0.141326	0.138196	0.201467	0.177562	0.212691	0.142113	0.237894	0.202964	0.244133	0.236508	0.227299	0.217858	0.22124	0.236869	0.225384	0.231707	0.213753	0.164968	0.150517	0.148264	0.17911	0.166622	0.141821	0.126668	0.136717	0.129662	0.116189	0.101072	0.0826138	0.0873554
EU27&UK3																0.159934	0.124776	0.124532	0.115878	0.141326	0.138196	0.201467	0.177562	0.212691	0.142113	0.237894	0.202964	0.244133	0.236508	0.227299	0.217858	0.22124	0.236869	0.225384	0.231707	0.213753	0.164968	0.150517	0.148264	0.17911	0.166622	0.141821	0.126668	0.136717	0.129662	0.116189	0.101072	0.0826138	0.0873554
ROW4																0.02	0.02	0.02	0.02	0.02	0.02	0.02	0.02	0.02	0.02	0.02	0.02	0.02	0.02	0.02	0.02	0.02	0.02	0.02	0.02	0.02	0.02	0.02	0.02	0.02	0.02	0.02	0.02	0.02	0.02	0.02	0.02	0.02	0.02
1.Yellow phosphorus production in China is from 1) Gao, Y. F., 2018. Brilliant achievement of phosphate chemical industry in China in past 40 years and development trend.Phosphate & Compound Fertilizer, 033(012):23-26. doi: CNKI:SUN:LFYF.0.2018-12-007.2018; 2) Huajing Industry Research Institute. 2021. Analysis on supply and demand status and competition pattern of yellow phosphorus in China in 2…
2.US data is based on the ratio of the amount of phosphate rock used for yellow phosphorus production (data from USGS, Phosphate Rock Statistics and Information) to the production of phosphorus rock.
3.European data are unavailable, data refer to the United States
4.ROW data is not available and is substituted based on the arithmetic mean of data from China, USA and Europe.
	Data is not available, refer to the data in 1979
	Data is not available, refer to the data in 2019
	Data is not available, estimated through the data 2001 and 2003
Average rate of yellow phosphorus generation rate, based on phosphorus rock production
Year	1930	1931	1932	1933	1934	1935	1936	1937	1938	1939	1940	1941	1942	1943	1944	1945	1946	1947	1948	1949	1950	1951	1952	1953	1954	1955	1956	1957	1958	1959	1960	1961	1962	1963	1964	1965	1966	1967	1968	1969	1970	1971	1972	1973	1974	1975	1976	1977	1978
Average rate of yellow phosphorus/phosphorus rock production	0.111111	0.111111	0.111111	0.111111	0.111111	0.111111	0.111111	0.111111	0.111111	0.111111	0.111111	0.111111	0.111111	0.111111	0.111111	0.111111	0.111111	0.111111	0.111111	0.111111	0.111111	0.111111	0.111111	0.111111	0.111111	0.111111	0.111111	0.111111	0.111111	0.111111	0.111111	0.111111	0.111111	0.111111	0.111111	0.111111	0.111111	0.111111	0.111111	0.111111	0.111111	0.111111	0.111111	0.111111	0.111111	0.111111	0.111111	0.111111	0.111111
* Generally, producing 1 ton of yellow phosphorus requires approximately 12 to 14 tons of raw materials, including about 8.5 to 9.5 tons of phosphate rock. Data is from Song J. The Research on Preparation of Precipitated Silica and CalciumNitrate from the Yellow Phosphorus Slag. 2014.
Average YPS/yellow phosphorus
Year	1930	1931	1932	1933	1934	1935	1936	1937	1938	1939	1940	1941	1942	1943	1944	1945	1946	1947	1948	1949	1950	1951	1952	1953	1954	1955	1956	1957	1958	1959	1960	1961	1962	1963	1964	1965	1966	1967	1968	1969	1970	1971	1972	1973	1974	1975	1976	1977	1978
Average rate of YPS/yellow phosphorus production	9	9	9	9	9	9	9	9	9	9	9	9	9	9	9	9	9	9	9	9	9	9	9	9	9	9	9	9	9	9	9	9	9	9	9	9	9	9	9	9	9	9	9	9	9	9	9	9	9
*The rate of YPS production to yellow phosphorus production is about 6-12. Data is from Song J. The Research on Preparation of Precipitated Silica and CalciumNitrate from the Yellow Phosphorus Slag. 2014.
[truncated: 42 more columns]

[truncated: 32 more sheets: Data S10, Data S11, Data S12, Data S13, Data S14, Data S15, Data S16, Data S17, Data S18, Data S19, Data S20, Data S21, Data S22, Data S23, Data S24, Data S25, Data S26, Data S27, Data S28, Data S29 …]
