# Supplementary material for: Natural Carbonation of Alkaline Industrial Wastes: A Large-Scale, Unaccounted Sink for CO2
Source: Research Square preprint supplement (doi:10.21203/rs.3.rs-5763182/v1), 2025-01-22
Supplement: Supplementary file 2 [file 8de3a2256eb3bdff734d52bf.docx]

**Table 1. Carbonation Rate Coefficients and Natural Carbonation Ratios of various alkaline industrial wastes**

| Large-particle alkaline industrial waste | Carbonation Rate Coefficients (mm/year0.5) | | | | | |
| --- | --- | --- | --- | --- | --- | --- |
| Mean | | Max | | Min | |
| Iron and steel slag* | 0.23 | | 0.36 | | 0.11 | |
| Magnesium slag* | 0.9 | | 0.15 | | 0.04 | |
| MSWI Bottom slag | 0.17 | | 0.27 | | 0.13 | |
| Waste concrete* | —— | | 15.00 | | 0.30 | |
| Waste mortar* | 19.6 | | 39.4 | | 4.2 | |
| Fine-particle alkaline industrial waste | CO₂ uptake (kg/t) 𝛹 | | | Natural Carbonation Ratios (%) 𝛾 | | |
| Mean | Max | Min | Mean | Max | Min |
| Coal combustion ash* | 40.78 | 47.45 | 33.50 | 58.40% | 72.03% | 51.46% |
| Yellow phosphorous slag* | 39.14 | 43.50 | 34.77 | 37.83% | 42.63% | 33.03% |
| MSWI fly ash* | 65.22 | 71.74 | 58.70 | 64.24% | 70.66% | 57.81% |
| Oil shale ash* | 66.74 | 73.42 | 60.07 | 69.13% | 76.04% | 62.22% |
| Biomass ash* | 65.40 | 65.98 | 64.82 | 66.87% | 68.30% | 65.45% |
| Calcium carbide slag * | 363.05 | 402.29 | 323.80 | 68.66% | 91.85% | 49.94% |
| Red/Lime mud* | 49.74 | 52.29 | 47.36 | 54.99% | 58.79% | 52.03% |
| Cement kiln dust | —— | —— | —— | 100% | 100% | 100% |
| Lime kiln dust52, 53 | —— | —— | —— | —— | 26% | 11.5% |

* represents experimentally self-measured carbonation rate, 𝛹 represents the CO₂ uptake (kg) by 1 ton of fine-particle alkaline waste by natural carbonation, 𝛾 represents the annual average proportion of carbonated alkaline components (CaO and MgO) accounting for the total alkaline components by natural weathering for fine-particle alkaline waste in stockpiling disposal way.
